# Supplementary material
Source: MDPI journal article supplement (https://www.mdpi.com/2072-4292/15/1/43)
Supplement: s1 [file s1]

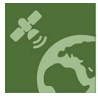

## Supplementary Materials

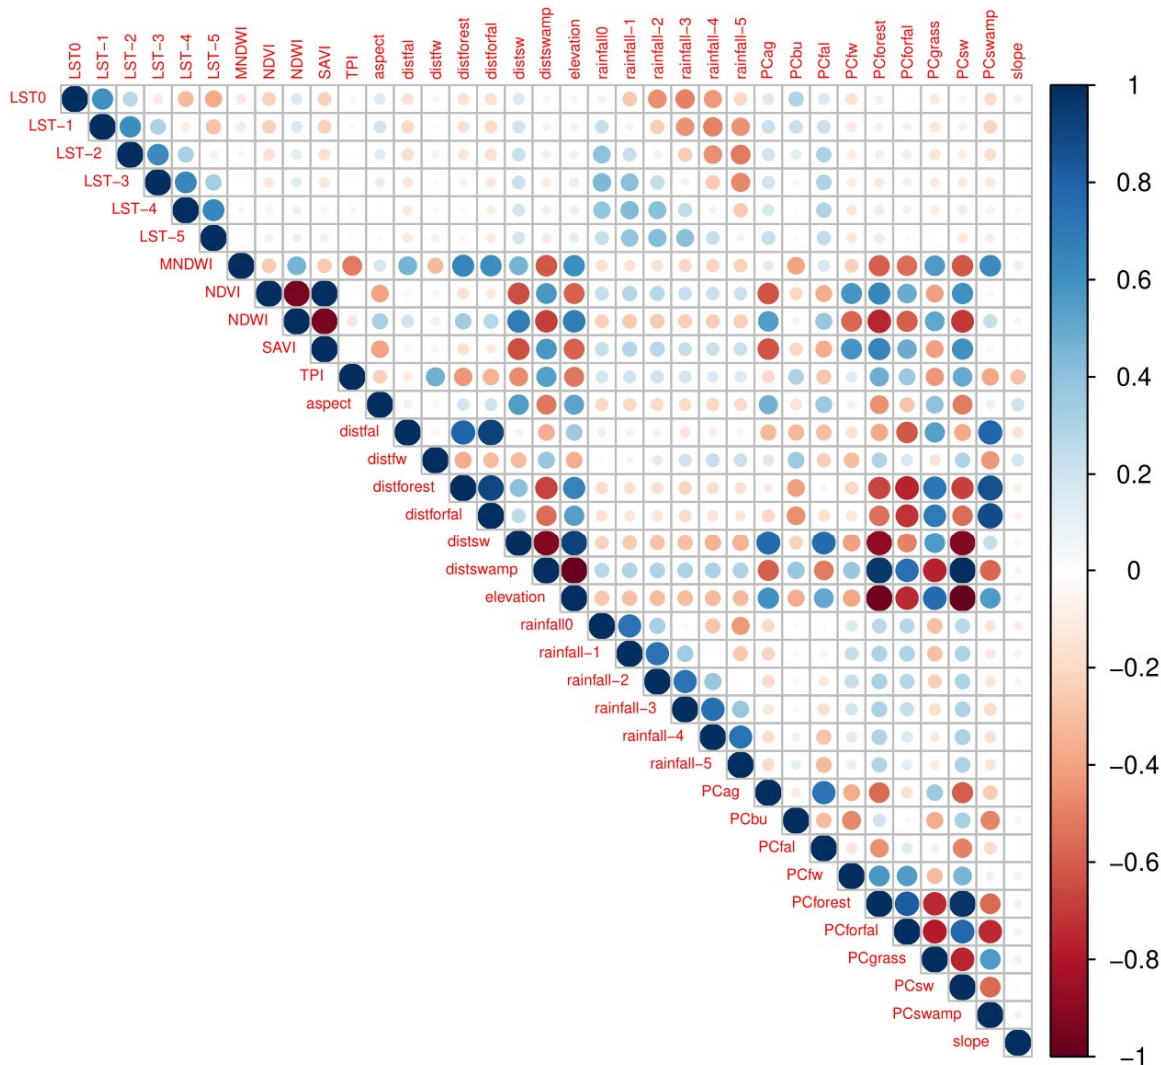

**Figure S1.** Variable correlation plot for *An. gambiae* and *An. paludis*.

Rainfall- $x$  where  $-x$  is the number of months prior (Rainfall<sup>0</sup> = current month, Rainfall<sup>-1</sup> = one month prior etc.), LST = land surface temperature, PC = proportional coverage of, dist = distance to, bu = built-up, fal = fallow, forest = forest, foral = forest and fallow combined, grass = grassland, ag = agriculture; fw = flowing water, sw = static water, clear = clearing, MNDWI = Modified Normalised Difference Water Index, NDVI = Normalised Difference Vegetation Index, NDWI = Normalised Difference Water Index, SAVI = Soil Adjusted Vegetation Index, TPI = Topographical Position Index.

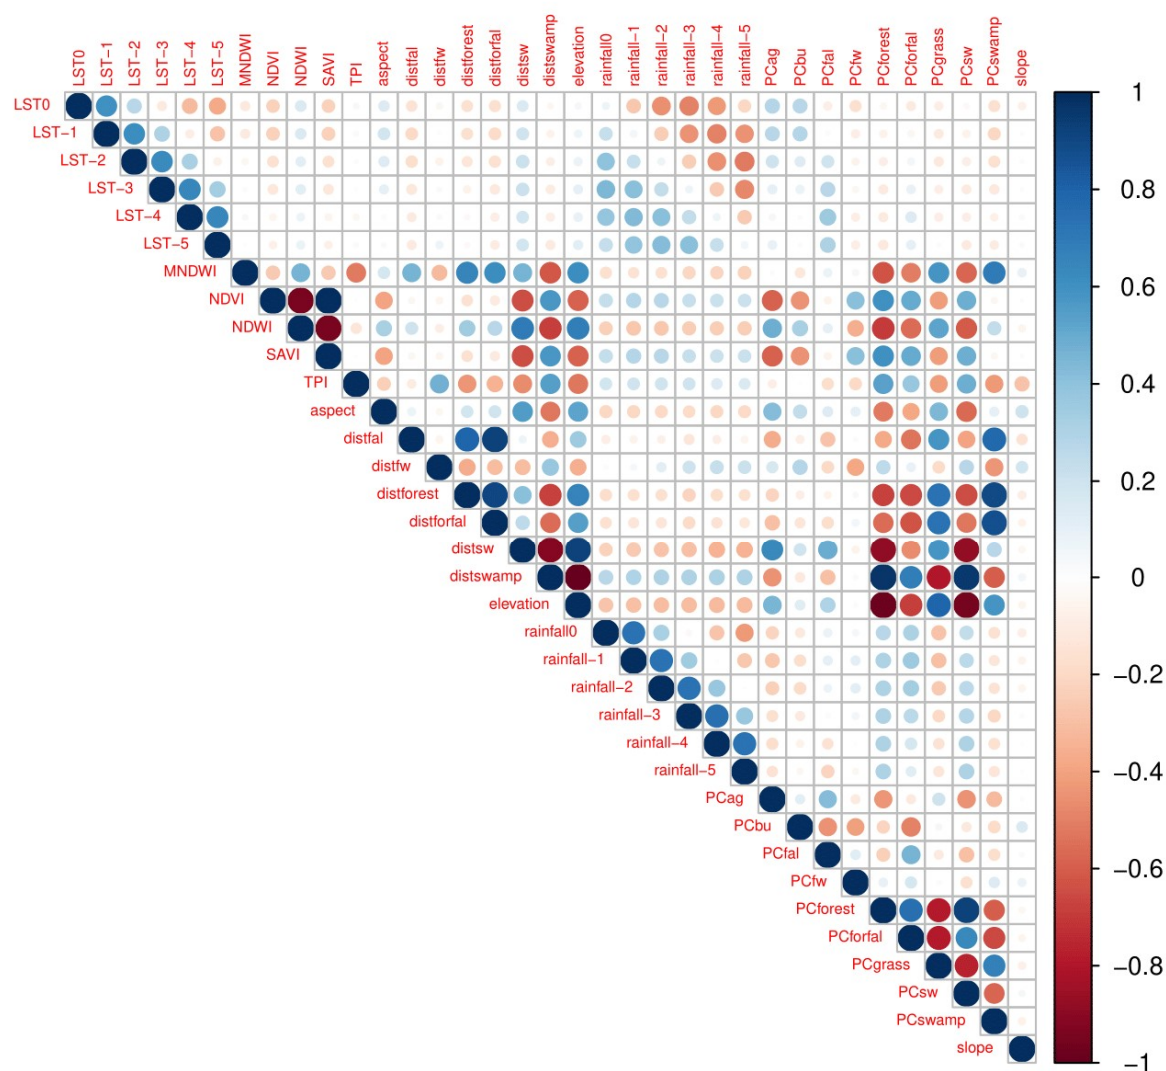

**Figure S2.** Variable correlation plot for *An. funestus*.

Rainfall<sup>-x</sup> where -x is the number of months prior (Rainfall<sup>0</sup> = current month, Rainfall<sup>-1</sup> = one month prior etc.), LST = land surface temperature, PC = proportional coverage of, dist = distance to, bu = built-up, fal = fallow, forest = forest, foral = forest and fallow combined, grass = grassland, ag = agriculture; fw = flowing water, sw = static water, clear = clearing, MNDWI = Modified Normalised Difference Water Index, NDVI = Normalised Difference Vegetation Index, NDWI = Normalised Difference Water Index, SAVI = Soil Adjusted Vegetation Index, TPI = Topographical Position Index.

**Table S1.** Confusion matrix for the Lodja land cover classification.

| Classified | Reference |        |       |       |       |        |       |                |        |
|------------|-----------|--------|-------|-------|-------|--------|-------|----------------|--------|
|            | F         | G      | AG    | FA    | BU    | WF     | WS    | Total          | UA (%) |
| F          | 353       |        | 5     | 20    |       |        | 1     | 379            | 93.14  |
| G          | 2         | 70     | 3     |       | 3     |        |       | 78             | 89.74  |
| AG         | 3         |        | 18    | 3     |       |        |       | 24             | 75.00  |
| FA         | 18        |        | 2     | 86    |       |        |       | 106            | 81.13  |
| BU         | 2         |        |       |       | 30    |        |       | 32             | 93.75  |
| WF         |           |        |       |       |       | 30     | 2     | 32             | 93.75  |
| WS         |           |        |       |       |       |        | 30    | 30             | 100.00 |
| Total      | 378       | 70     | 28    | 109   | 33    | 30     | 33    | 681            |        |
| PA (%)     | 93.39     | 100.00 | 64.29 | 78.90 | 90.91 | 100.00 | 90.91 | OA (%) = 90.60 |        |

F = forest, G = grassland, AG = agriculture, FA = fallow, BU = built-up, WF = water flowing, WS = water static, UA = User's accuracy, PA = Producer's accuracy, OA = Overall accuracy.

**Table S2.** Confusion matrix for the Kapolowe land cover classification.

|            | Reference |       |       |       |       |       |       |       |       |                |
|------------|-----------|-------|-------|-------|-------|-------|-------|-------|-------|----------------|
| Classified | F         | G     | AG    | FA    | BU    | WF    | WS    | SW    | Total | UA (%)         |
| F          | 89        |       | 5     | 1     |       |       |       | 2     | 97    | 91.75          |
| G          | 1         | 75    | 11    | 5     |       |       |       |       | 92    | 81.52          |
| AG         |           | 3     | 206   | 10    | 3     |       |       |       | 222   | 92.79          |
| FA         |           | 1     | 17    | 70    |       |       |       | 1     | 89    | 78.65          |
| BU         |           |       | 1     |       | 33    |       |       |       | 34    | 97.06          |
| WF         |           | 1     | 1     |       |       | 28    | 1     |       | 31    | 90.32          |
| WS         |           |       |       |       |       |       | 33    | 2     | 35    | 94.29          |
| SW         |           | 2     |       |       |       | 1     |       | 90    | 93    | 96.77          |
| Total      | 90        | 82    | 241   | 86    | 36    | 29    | 34    | 95    | 693   |                |
| PA (%)     | 98.89     | 91.46 | 85.48 | 81.40 | 91.67 | 96.55 | 97.06 | 94.74 |       | OA (%) = 90.04 |

F = forest, G = grassland, AG = agriculture, FA = fallow, BU = built-up, WF = water flowing, WS = water static, SW = swamp, UA = User's accuracy, PA = Producer's accuracy, OA = Overall accuracy.

**Table S3.** Random forest parameter tuning for *An. gambiae* s. l.

| Trees | Minimum Leaf Population | Maximum Nodes | Variables per Split | Bag Fraction | R <sup>2</sup> |
|-------|-------------------------|---------------|---------------------|--------------|----------------|
| 200   | 1                       | unlimited     | √ variables         | 0.5          | 0.703          |
| 200   | 2                       | unlimited     | √ variables         | 0.5          | 0.691          |
| 200   | 3                       | unlimited     | √ variables         | 0.5          | 0.689          |
| 200   | 4                       | unlimited     | √ variables         | 0.5          | 0.681          |
| 200   | 5                       | unlimited     | √ variables         | 0.5          | 0.664          |
| 200   | 6                       | unlimited     | √ variables         | 0.5          | 0.660          |
| 200   | 7                       | unlimited     | √ variables         | 0.5          | 0.657          |
| 200   | 8                       | unlimited     | √ variables         | 0.5          | 0.653          |

|     |    |           |                           |     |       |
|-----|----|-----------|---------------------------|-----|-------|
| 200 | 9  | unlimited | $\sqrt{\text{variables}}$ | 0.5 | 0.645 |
| 200 | 10 | unlimited | $\sqrt{\text{variables}}$ | 0.5 | 0.226 |
| 1   | 1  | unlimited | $\sqrt{\text{variables}}$ | 0.5 | 0.272 |
| 2   | 1  | unlimited | $\sqrt{\text{variables}}$ | 0.5 | 0.364 |
| 3   | 1  | unlimited | $\sqrt{\text{variables}}$ | 0.5 | 0.503 |
| 4   | 1  | unlimited | $\sqrt{\text{variables}}$ | 0.5 | 0.525 |
| 5   | 1  | unlimited | $\sqrt{\text{variables}}$ | 0.5 | 0.531 |
| 6   | 1  | unlimited | $\sqrt{\text{variables}}$ | 0.5 | 0.568 |
| 7   | 1  | unlimited | $\sqrt{\text{variables}}$ | 0.5 | 0.596 |
| 8   | 1  | unlimited | $\sqrt{\text{variables}}$ | 0.5 | 0.576 |
| 9   | 1  | unlimited | $\sqrt{\text{variables}}$ | 0.5 | 0.607 |
| 10  | 1  | unlimited | $\sqrt{\text{variables}}$ | 0.5 | 0.693 |
| 50  | 1  | unlimited | $\sqrt{\text{variables}}$ | 0.5 | 0.682 |
| 100 | 1  | unlimited | $\sqrt{\text{variables}}$ | 0.5 | 0.703 |
| 300 | 1  | unlimited | $\sqrt{\text{variables}}$ | 0.5 | 0.703 |
| 500 | 1  | unlimited | $\sqrt{\text{variables}}$ | 0.5 | 0.693 |
| 200 | 1  | 2         | $\sqrt{\text{variables}}$ | 0.5 | 0.400 |
| 200 | 1  | 5         | $\sqrt{\text{variables}}$ | 0.5 | 0.590 |
| 200 | 1  | 10        | $\sqrt{\text{variables}}$ | 0.5 | 0.621 |
| 200 | 1  | 20        | $\sqrt{\text{variables}}$ | 0.5 | 0.638 |
| 200 | 1  | 30        | $\sqrt{\text{variables}}$ | 0.5 | 0.661 |
| 200 | 1  | 40        | $\sqrt{\text{variables}}$ | 0.5 | 0.678 |
| 200 | 1  | 50        | $\sqrt{\text{variables}}$ | 0.5 | 0.690 |
| 200 | 1  | unlimited | 2                         | 0.5 | 0.675 |
| 200 | 1  | unlimited | 3                         | 0.5 | 0.679 |
| 200 | 1  | unlimited | 4                         | 0.5 | 0.701 |
| 200 | 1  | unlimited | 5                         | 0.5 | 0.703 |
| 200 | 1  | unlimited | 6                         | 0.5 | 0.701 |

|     |   |           |             |     |       |
|-----|---|-----------|-------------|-----|-------|
| 200 | 1 | unlimited | 7           | 0.5 | 0.697 |
| 200 | 1 | unlimited | 8           | 0.5 | 0.687 |
| 200 | 1 | unlimited | 9           | 0.5 | 0.685 |
| 200 | 1 | unlimited | 10          | 0.5 | 0.679 |
| 200 | 1 | unlimited | 11          | 0.5 | 0.693 |
| 200 | 1 | unlimited | 12          | 0.5 | 0.679 |
| 200 | 1 | unlimited | 13          | 0.5 | 0.681 |
| 200 | 1 | unlimited | 14          | 0.5 | 0.687 |
| 200 | 1 | unlimited | 15          | 0.5 | 0.683 |
| 200 | 1 | unlimited | 16          | 0.5 | 0.690 |
| 200 | 1 | unlimited | 17          | 0.5 | 0.686 |
| 200 | 1 | unlimited | 18          | 0.5 | 0.687 |
| 200 | 1 | unlimited | 19          | 0.5 | 0.689 |
| 200 | 1 | unlimited | 20          | 0.5 | 0.683 |
| 200 | 1 | unlimited | 21          | 0.5 | 0.693 |
| 200 | 1 | unlimited | 22          | 0.5 | 0.693 |
| 200 | 1 | unlimited | 23          | 0.5 | 0.686 |
| 200 | 1 | unlimited | 24          | 0.5 | 0.677 |
| 200 | 1 | unlimited | 25          | 0.5 | 0.679 |
| 200 | 1 | unlimited | 26          | 0.5 | 0.669 |
| 200 | 1 | unlimited | 27          | 0.5 | 0.669 |
| 200 | 1 | unlimited | 28          | 0.5 | 0.676 |
| 200 | 1 | unlimited | 29          | 0.5 | 0.677 |
| 200 | 1 | unlimited | 30          | 0.5 | 0.687 |
| 200 | 1 | unlimited | √ variables | 0.1 | 0.627 |
| 200 | 1 | unlimited | √ variables | 0.2 | 0.671 |
| 200 | 1 | unlimited | √ variables | 0.3 | 0.674 |
| 200 | 1 | unlimited | √ variables | 0.4 | 0.671 |

|     |   |           |                           |      |         |
|-----|---|-----------|---------------------------|------|---------|
| 200 | 1 | unlimited | $\sqrt{\text{variables}}$ | 0.5  | 0.703   |
| 200 | 1 | unlimited | $\sqrt{\text{variables}}$ | 0.6  | 0.687   |
| 200 | 1 | unlimited | $\sqrt{\text{variables}}$ | 0.7  | 0.707 * |
| 200 | 1 | unlimited | $\sqrt{\text{variables}}$ | 0.8  | 0.688   |
| 200 | 1 | unlimited | $\sqrt{\text{variables}}$ | 0.85 | 0.688   |
| 200 | 1 | unlimited | $\sqrt{\text{variables}}$ | 0.9  | 0.655   |
| 200 | 1 | unlimited | $\sqrt{\text{variables}}$ | 0.91 | 0.671   |
| 200 | 1 | unlimited | $\sqrt{\text{variables}}$ | 0.92 | 0.669   |
| 200 | 1 | unlimited | $\sqrt{\text{variables}}$ | 0.93 | 0.679   |
| 200 | 1 | unlimited | $\sqrt{\text{variables}}$ | 0.94 | 0.661   |
| 200 | 1 | unlimited | $\sqrt{\text{variables}}$ | 0.95 | 0.669   |
| 200 | 1 | unlimited | $\sqrt{\text{variables}}$ | 0.96 | 0.668   |
| 200 | 1 | unlimited | $\sqrt{\text{variables}}$ | 0.97 | 0.663   |
| 200 | 1 | unlimited | $\sqrt{\text{variables}}$ | 0.98 | 0.664   |
| 200 | 1 | unlimited | $\sqrt{\text{variables}}$ | 0.99 | 0.672   |
| 200 | 1 | unlimited | $\sqrt{\text{variables}}$ | 1    | 0.692   |

R<sup>2</sup> corresponds to observed mosquito abundance values (from field survey) versus mean predicted abundance values for the validation data set. Default values for variables per split is the square root of the number of variables. \* denotes the final parameters used for the predictive random forest modelling.

**Table S4.** Random forest parameter tuning for *An. funestus*.

| Trees | Minimum Leaf Population | Maximum nodes | Variables per Split       | Bag Fraction | R <sup>2</sup> |
|-------|-------------------------|---------------|---------------------------|--------------|----------------|
| 200   | 1                       | unlimited     | $\sqrt{\text{variables}}$ | 0.5          | 0.837          |
| 200   | 2                       | unlimited     | $\sqrt{\text{variables}}$ | 0.5          | 0.832          |
| 200   | 3                       | unlimited     | $\sqrt{\text{variables}}$ | 0.5          | 0.822          |
| 200   | 4                       | unlimited     | $\sqrt{\text{variables}}$ | 0.5          | 0.793          |
| 200   | 5                       | unlimited     | $\sqrt{\text{variables}}$ | 0.5          | 0.765          |
| 200   | 6                       | unlimited     | $\sqrt{\text{variables}}$ | 0.5          | 0.735          |
| 200   | 7                       | unlimited     | $\sqrt{\text{variables}}$ | 0.5          | 0.722          |

|     |    |           |             |     |       |
|-----|----|-----------|-------------|-----|-------|
| 200 | 8  | unlimited | √ variables | 0.5 | 0.707 |
| 200 | 9  | unlimited | √ variables | 0.5 | 0.697 |
| 200 | 10 | unlimited | √ variables | 0.5 | 0.837 |
| 1   | 1  | unlimited | √ variables | 0.5 | 0.788 |
| 2   | 1  | unlimited | √ variables | 0.5 | 0.803 |
| 3   | 1  | unlimited | √ variables | 0.5 | 0.796 |
| 4   | 1  | unlimited | √ variables | 0.5 | 0.815 |
| 5   | 1  | unlimited | √ variables | 0.5 | 0.850 |
| 6   | 1  | unlimited | √ variables | 0.5 | 0.859 |
| 7   | 1  | unlimited | √ variables | 0.5 | 0.860 |
| 8   | 1  | unlimited | √ variables | 0.5 | 0.858 |
| 9   | 1  | unlimited | √ variables | 0.5 | 0.859 |
| 10  | 1  | unlimited | √ variables | 0.5 | 0.860 |
| 50  | 1  | unlimited | √ variables | 0.5 | 0.859 |
| 100 | 1  | unlimited | √ variables | 0.5 | 0.850 |
| 300 | 1  | unlimited | √ variables | 0.5 | 0.841 |
| 500 | 1  | unlimited | √ variables | 0.5 | 0.843 |
| 200 | 1  | 2         | √ variables | 0.5 | 0.724 |
| 200 | 1  | 5         | √ variables | 0.5 | 0.811 |
| 200 | 1  | 10        | √ variables | 0.5 | 0.828 |
| 200 | 1  | 20        | √ variables | 0.5 | 0.833 |
| 200 | 1  | 30        | √ variables | 0.5 | 0.832 |
| 200 | 1  | 40        | √ variables | 0.5 | 0.835 |
| 200 | 1  | 50        | √ variables | 0.5 | 0.836 |
| 200 | 1  | unlimited | 2           | 0.5 | 0.814 |
| 200 | 1  | unlimited | 3           | 0.5 | 0.823 |
| 200 | 1  | unlimited | 4           | 0.5 | 0.841 |
| 200 | 1  | unlimited | 5           | 0.5 | 0.837 |

|     |   |           |             |     |       |
|-----|---|-----------|-------------|-----|-------|
| 200 | 1 | unlimited | 6           | 0.5 | 0.844 |
| 200 | 1 | unlimited | 7           | 0.5 | 0.844 |
| 200 | 1 | unlimited | 8           | 0.5 | 0.849 |
| 200 | 1 | unlimited | 9           | 0.5 | 0.849 |
| 200 | 1 | unlimited | 10          | 0.5 | 0.843 |
| 200 | 1 | unlimited | 11          | 0.5 | 0.847 |
| 200 | 1 | unlimited | 12          | 0.5 | 0.854 |
| 200 | 1 | unlimited | 13          | 0.5 | 0.852 |
| 200 | 1 | unlimited | 14          | 0.5 | 0.848 |
| 200 | 1 | unlimited | 15          | 0.5 | 0.849 |
| 200 | 1 | unlimited | 16          | 0.5 | 0.845 |
| 200 | 1 | unlimited | 17          | 0.5 | 0.851 |
| 200 | 1 | unlimited | 18          | 0.5 | 0.847 |
| 200 | 1 | unlimited | 19          | 0.5 | 0.847 |
| 200 | 1 | unlimited | 20          | 0.5 | 0.846 |
| 200 | 1 | unlimited | 21          | 0.5 | 0.848 |
| 200 | 1 | unlimited | 22          | 0.5 | 0.844 |
| 200 | 1 | unlimited | 23          | 0.5 | 0.847 |
| 200 | 1 | unlimited | 24          | 0.5 | 0.849 |
| 200 | 1 | unlimited | 25          | 0.5 | 0.847 |
| 200 | 1 | unlimited | 26          | 0.5 | 0.846 |
| 200 | 1 | unlimited | 27          | 0.5 | 0.845 |
| 200 | 1 | unlimited | 28          | 0.5 | 0.846 |
| 200 | 1 | unlimited | 29          | 0.5 | 0.846 |
| 200 | 1 | unlimited | 30          | 0.5 | 0.842 |
| 200 | 1 | unlimited | √ variables | 0.1 | 0.630 |
| 200 | 1 | unlimited | √ variables | 0.2 | 0.739 |
| 200 | 1 | unlimited | √ variables | 0.3 | 0.806 |



|     |   |           |                           |      |         |
|-----|---|-----------|---------------------------|------|---------|
| 200 | 1 | unlimited | $\sqrt{\text{variables}}$ | 0.4  | 0.830   |
| 200 | 1 | unlimited | $\sqrt{\text{variables}}$ | 0.5  | 0.837   |
| 200 | 1 | unlimited | $\sqrt{\text{variables}}$ | 0.6  | 0.848   |
| 200 | 1 | unlimited | $\sqrt{\text{variables}}$ | 0.7  | 0.855   |
| 200 | 1 | unlimited | $\sqrt{\text{variables}}$ | 0.8  | 0.854   |
| 200 | 1 | unlimited | $\sqrt{\text{variables}}$ | 0.85 | 0.847   |
| 200 | 1 | unlimited | $\sqrt{\text{variables}}$ | 0.9  | 0.859   |
| 200 | 1 | unlimited | $\sqrt{\text{variables}}$ | 0.91 | 0.861 * |
| 200 | 1 | unlimited | $\sqrt{\text{variables}}$ | 0.92 | 0.858   |
| 200 | 1 | unlimited | $\sqrt{\text{variables}}$ | 0.93 | 0.857   |
| 200 | 1 | unlimited | $\sqrt{\text{variables}}$ | 0.94 | 0.858   |
| 200 | 1 | unlimited | $\sqrt{\text{variables}}$ | 0.95 | 0.860   |
| 200 | 1 | unlimited | $\sqrt{\text{variables}}$ | 0.96 | 0.860   |
| 200 | 1 | unlimited | $\sqrt{\text{variables}}$ | 0.97 | 0.857   |
| 200 | 1 | unlimited | $\sqrt{\text{variables}}$ | 0.98 | 0.855   |
| 200 | 1 | unlimited | $\sqrt{\text{variables}}$ | 0.99 | 0.855   |
| 200 | 1 | unlimited | $\sqrt{\text{variables}}$ | 1    | 0.845   |

R<sup>2</sup> corresponds to observed mosquito abundance values (from field survey) versus mean predicted abundance values for the validation data set. Default values for variables per split is the square root of the number of variables. \* denotes the final parameters used for the predictive random forest modelling.

**Table S5.** Random forest parameter tuning for *An. paludis*.

| Trees | Minimum Leaf Population | Maximum Nodes | Variables per Split       | Bag Fraction | R <sup>2</sup> |
|-------|-------------------------|---------------|---------------------------|--------------|----------------|
| 200   | 1                       | unlimited     | $\sqrt{\text{variables}}$ | 0.5          | 0.426          |
| 200   | 2                       | unlimited     | $\sqrt{\text{variables}}$ | 0.5          | 0.422          |
| 200   | 3                       | unlimited     | $\sqrt{\text{variables}}$ | 0.5          | 0.420          |
| 200   | 4                       | unlimited     | $\sqrt{\text{variables}}$ | 0.5          | 0.419          |
| 200   | 5                       | unlimited     | $\sqrt{\text{variables}}$ | 0.5          | 0.409          |
| 200   | 6                       | unlimited     | $\sqrt{\text{variables}}$ | 0.5          | 0.400          |

|     |    |           |                           |     |       |
|-----|----|-----------|---------------------------|-----|-------|
| 200 | 7  | unlimited | $\sqrt{\text{variables}}$ | 0.5 | 0.391 |
| 200 | 8  | unlimited | $\sqrt{\text{variables}}$ | 0.5 | 0.393 |
| 200 | 9  | unlimited | $\sqrt{\text{variables}}$ | 0.5 | 0.390 |
| 200 | 10 | unlimited | $\sqrt{\text{variables}}$ | 0.5 | 0.426 |
| 1   | 1  | unlimited | $\sqrt{\text{variables}}$ | 0.5 | 0.199 |
| 2   | 1  | unlimited | $\sqrt{\text{variables}}$ | 0.5 | 0.327 |
| 3   | 1  | unlimited | $\sqrt{\text{variables}}$ | 0.5 | 0.383 |
| 4   | 1  | unlimited | $\sqrt{\text{variables}}$ | 0.5 | 0.404 |
| 5   | 1  | unlimited | $\sqrt{\text{variables}}$ | 0.5 | 0.395 |
| 6   | 1  | unlimited | $\sqrt{\text{variables}}$ | 0.5 | 0.392 |
| 7   | 1  | unlimited | $\sqrt{\text{variables}}$ | 0.5 | 0.425 |
| 8   | 1  | unlimited | $\sqrt{\text{variables}}$ | 0.5 | 0.445 |
| 9   | 1  | unlimited | $\sqrt{\text{variables}}$ | 0.5 | 0.443 |
| 10  | 1  | unlimited | $\sqrt{\text{variables}}$ | 0.5 | 0.423 |
| 50  | 1  | unlimited | $\sqrt{\text{variables}}$ | 0.5 | 0.431 |
| 100 | 1  | unlimited | $\sqrt{\text{variables}}$ | 0.5 | 0.433 |
| 300 | 1  | unlimited | $\sqrt{\text{variables}}$ | 0.5 | 0.432 |
| 500 | 1  | unlimited | $\sqrt{\text{variables}}$ | 0.5 | 0.440 |
| 200 | 1  | 2         | $\sqrt{\text{variables}}$ | 0.5 | 0.251 |
| 200 | 1  | 5         | $\sqrt{\text{variables}}$ | 0.5 | 0.329 |
| 200 | 1  | 10        | $\sqrt{\text{variables}}$ | 0.5 | 0.345 |
| 200 | 1  | 20        | $\sqrt{\text{variables}}$ | 0.5 | 0.383 |
| 200 | 1  | 30        | $\sqrt{\text{variables}}$ | 0.5 | 0.406 |
| 200 | 1  | 40        | $\sqrt{\text{variables}}$ | 0.5 | 0.414 |
| 200 | 1  | 50        | $\sqrt{\text{variables}}$ | 0.5 | 0.419 |
| 200 | 1  | unlimited | 2                         | 0.5 | 0.411 |
| 200 | 1  | unlimited | 3                         | 0.5 | 0.411 |
| 200 | 1  | unlimited | 4                         | 0.5 | 0.417 |

|     |   |           |             |     |         |
|-----|---|-----------|-------------|-----|---------|
| 200 | 1 | unlimited | 5           | 0.5 | 0.426   |
| 200 | 1 | unlimited | 6           | 0.5 | 0.433   |
| 200 | 1 | unlimited | 7           | 0.5 | 0.432   |
| 200 | 1 | unlimited | 8           | 0.5 | 0.443   |
| 200 | 1 | unlimited | 9           | 0.5 | 0.425   |
| 200 | 1 | unlimited | 10          | 0.5 | 0.430   |
| 200 | 1 | unlimited | 11          | 0.5 | 0.439   |
| 200 | 1 | unlimited | 12          | 0.5 | 0.441   |
| 200 | 1 | unlimited | 13          | 0.5 | 0.438   |
| 200 | 1 | unlimited | 14          | 0.5 | 0.439   |
| 200 | 1 | unlimited | 15          | 0.5 | 0.437   |
| 200 | 1 | unlimited | 16          | 0.5 | 0.435   |
| 200 | 1 | unlimited | 17          | 0.5 | 0.437   |
| 200 | 1 | unlimited | 18          | 0.5 | 0.431   |
| 200 | 1 | unlimited | 19          | 0.5 | 0.435   |
| 200 | 1 | unlimited | 20          | 0.5 | 0.436   |
| 200 | 1 | unlimited | 21          | 0.5 | 0.428   |
| 200 | 1 | unlimited | 22          | 0.5 | 0.429   |
| 200 | 1 | unlimited | 23          | 0.5 | 0.434   |
| 200 | 1 | unlimited | 24          | 0.5 | 0.440   |
| 200 | 1 | unlimited | 25          | 0.5 | 0.447   |
| 200 | 1 | unlimited | 26          | 0.5 | 0.447   |
| 200 | 1 | unlimited | √ variables | 0.1 | 0.359   |
| 200 | 1 | unlimited | √ variables | 0.2 | 0.377   |
| 200 | 1 | unlimited | √ variables | 0.3 | 0.399   |
| 200 | 1 | unlimited | √ variables | 0.4 | 0.414   |
| 200 | 1 | unlimited | √ variables | 0.5 | 0.426   |
| 200 | 1 | unlimited | √ variables | 0.6 | 0.448 * |

|     |   |           |                           |      |       |
|-----|---|-----------|---------------------------|------|-------|
| 200 | 1 | unlimited | $\sqrt{\text{variables}}$ | 0.7  | 0.440 |
| 200 | 1 | unlimited | $\sqrt{\text{variables}}$ | 0.8  | 0.442 |
| 200 | 1 | unlimited | $\sqrt{\text{variables}}$ | 0.85 | 0.434 |
| 200 | 1 | unlimited | $\sqrt{\text{variables}}$ | 0.9  | 0.426 |
| 200 | 1 | unlimited | $\sqrt{\text{variables}}$ | 0.91 | 0.430 |
| 200 | 1 | unlimited | $\sqrt{\text{variables}}$ | 0.92 | 0.432 |
| 200 | 1 | unlimited | $\sqrt{\text{variables}}$ | 0.93 | 0.430 |
| 200 | 1 | unlimited | $\sqrt{\text{variables}}$ | 0.94 | 0.435 |
| 200 | 1 | unlimited | $\sqrt{\text{variables}}$ | 0.95 | 0.437 |
| 200 | 1 | unlimited | $\sqrt{\text{variables}}$ | 0.96 | 0.439 |
| 200 | 1 | unlimited | $\sqrt{\text{variables}}$ | 0.97 | 0.424 |
| 200 | 1 | unlimited | $\sqrt{\text{variables}}$ | 0.98 | 0.431 |
| 200 | 1 | unlimited | $\sqrt{\text{variables}}$ | 0.99 | 0.422 |
| 200 | 1 | unlimited | $\sqrt{\text{variables}}$ | 1    | 0.442 |

$R^2$  corresponds to observed mosquito abundance values (from field survey) versus mean predicted abundance values for the validation data set. Default values for variables per split is the square root of the number of variables. \* denotes the final parameters used for the predictive random forest modelling.

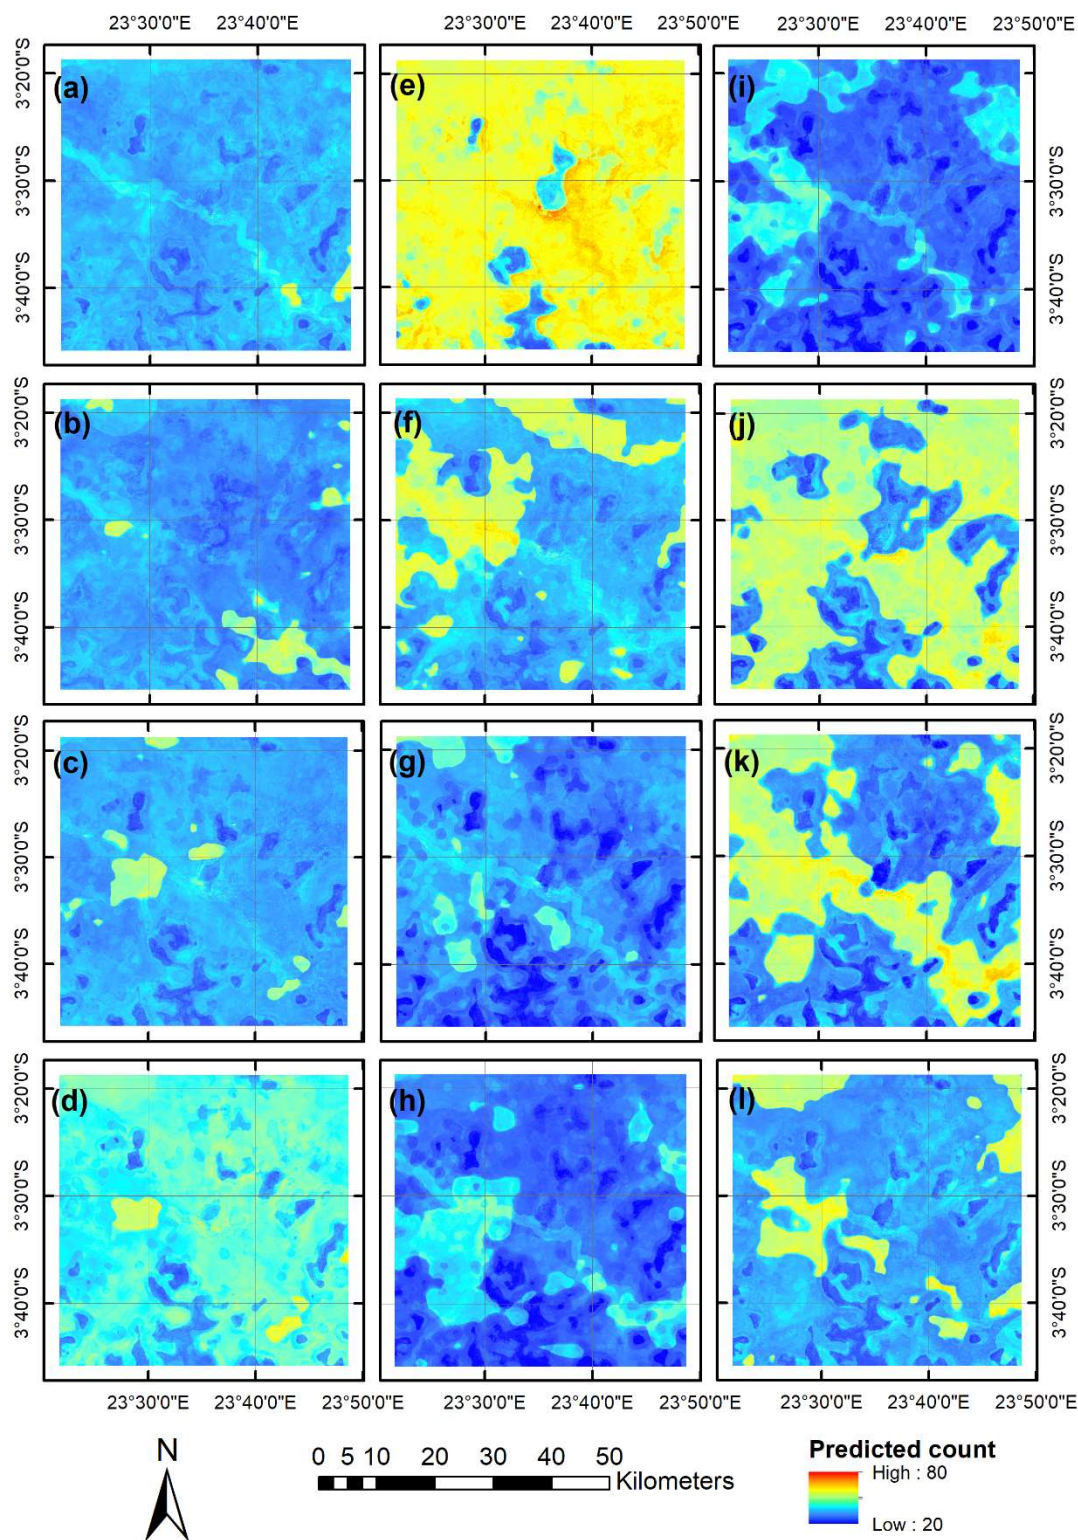

**Figure S3.** Predicted counts of *An. gambiae s.l.* for the Lodja study area for (a) January 2015; (b) February 2015; (c) March 2015; (d) April 2015; (e) May 2015; (f) June 2015; (g) July 2015; (h) August 2015; (i) September 2015; (j) October 2015; (k) November 2015; (l) December 2015.



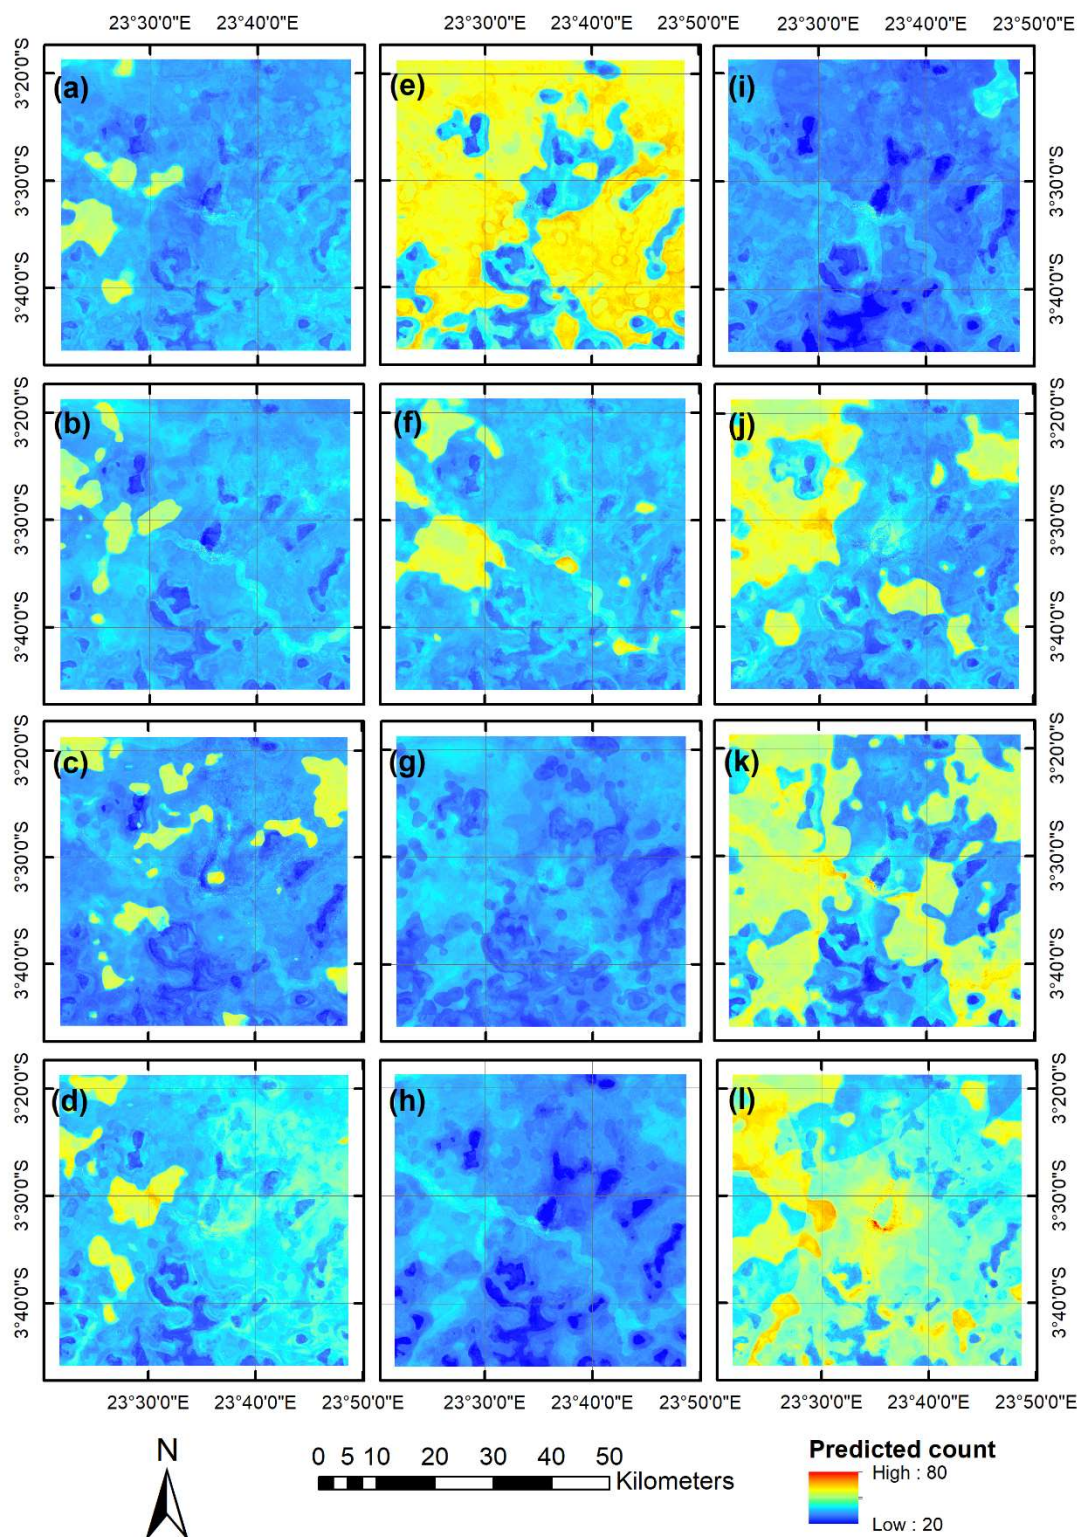

**Figure S4.** Predicted counts of *An. gambiae s.l.* for the Lodja study area for (a) January 2016; (b) February 2016; (c) March 2016; (d) April 2016; (e) May 2016; (f) June 2016; (g) July 2016; (h) August 2016; (i) September 2016; (j) October 2016; (k) November 2016; (l) December 2016.

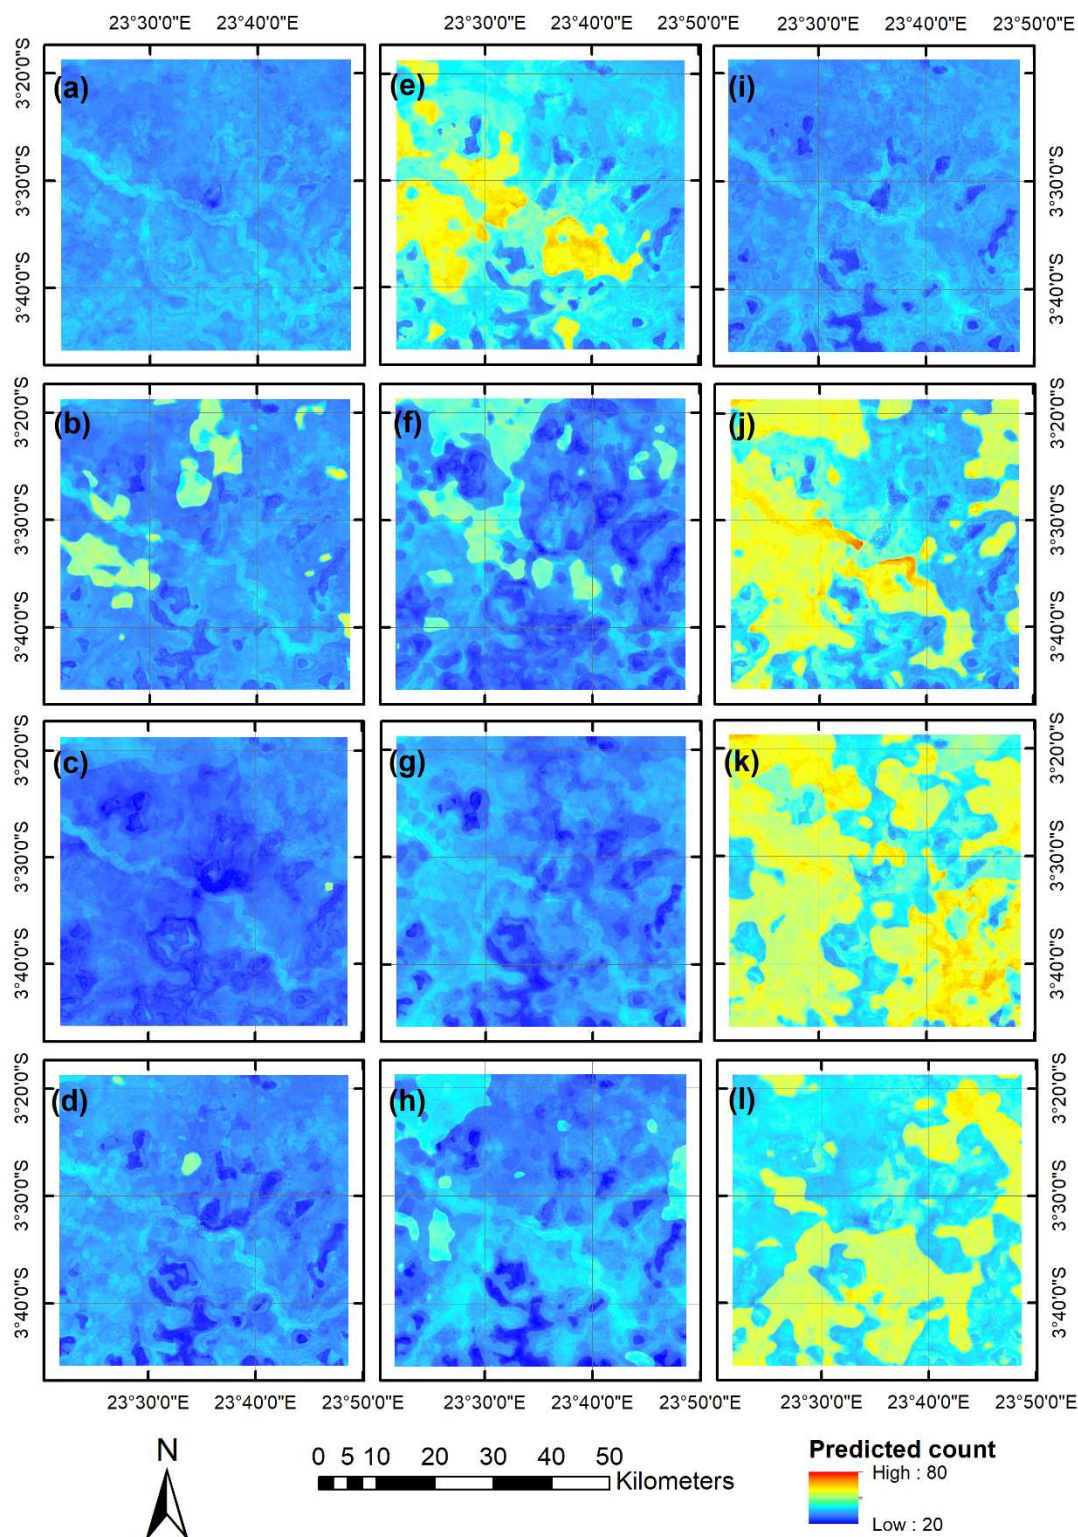

**Figure S5.** Predicted counts of *An. gambiae s.l.* for the Lodja study area for (a) January 2017; (b) February 2017; (c) March 2017; (d) April 2017; (e) May 2017; (f) June 2017; (g) July 2017; (h) August 2017; (i) September 2017; (j) October 2017; (k) November 2017; (l) December 2017.



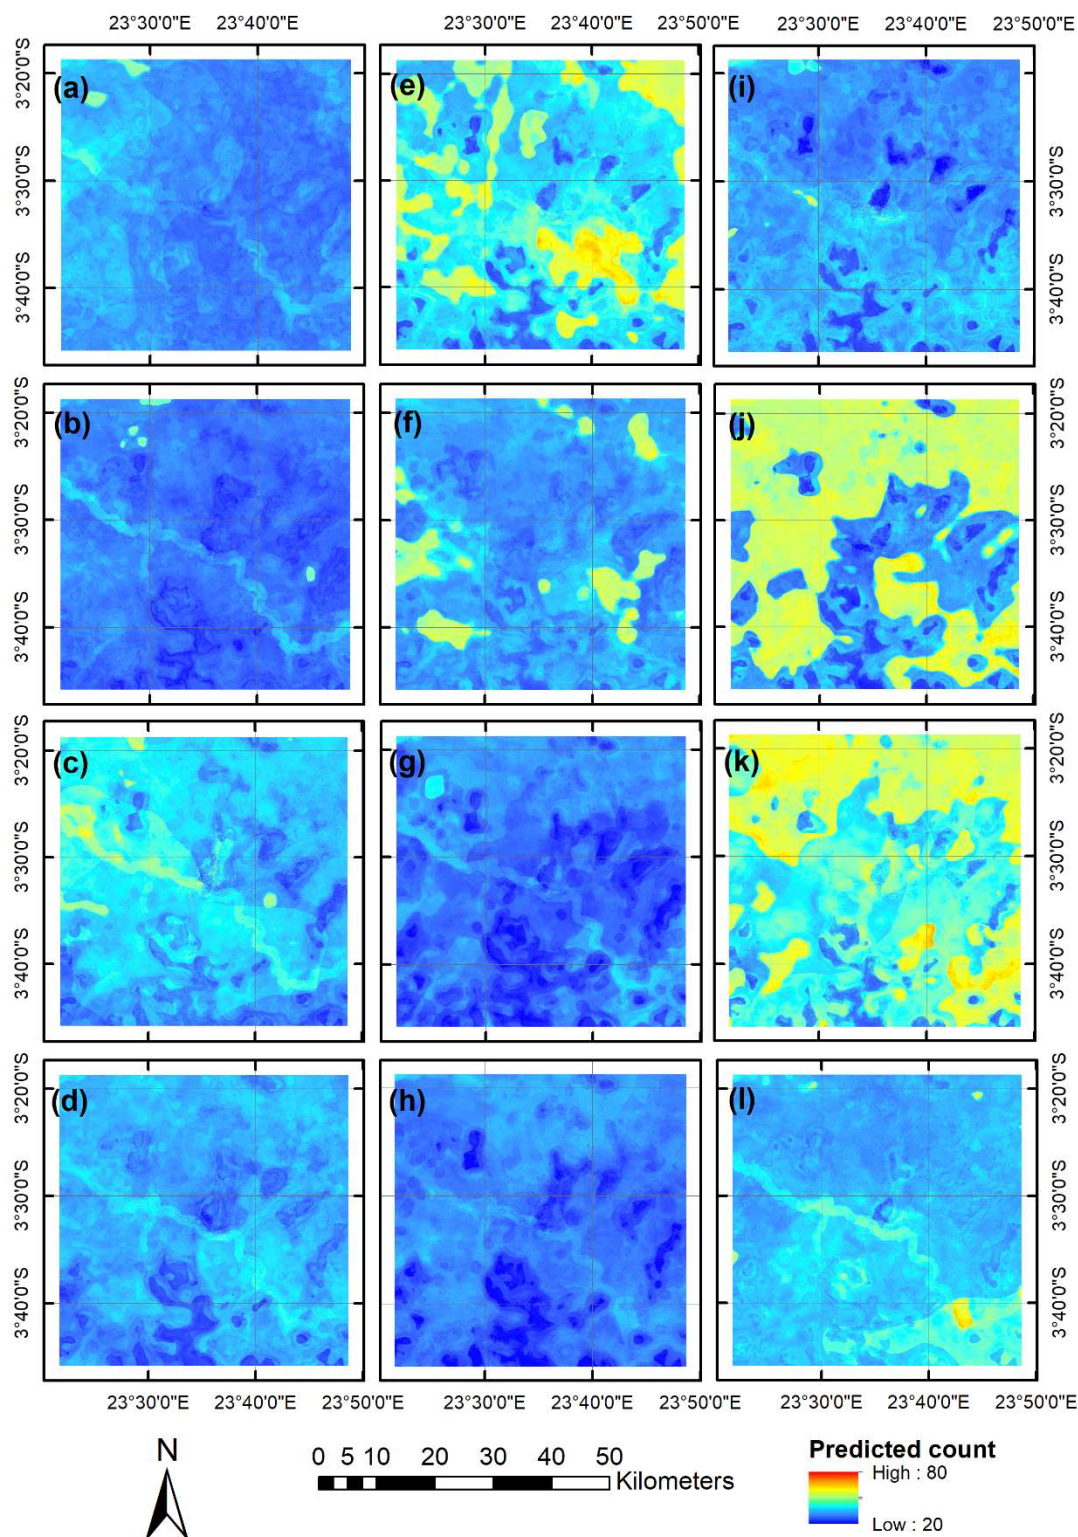

**Figure S6.** Predicted counts of *An. gambiae s.l.* for the Lodja study area for (a) January 2019; (b) February 2019; (c) March 2019; (d) April 2019; (e) May 2019; (f) June 2019; (g) July 2019; (h) August 2019; (i) September 2019; (j) October 2019; (k) November 2019; (l) December 2019.



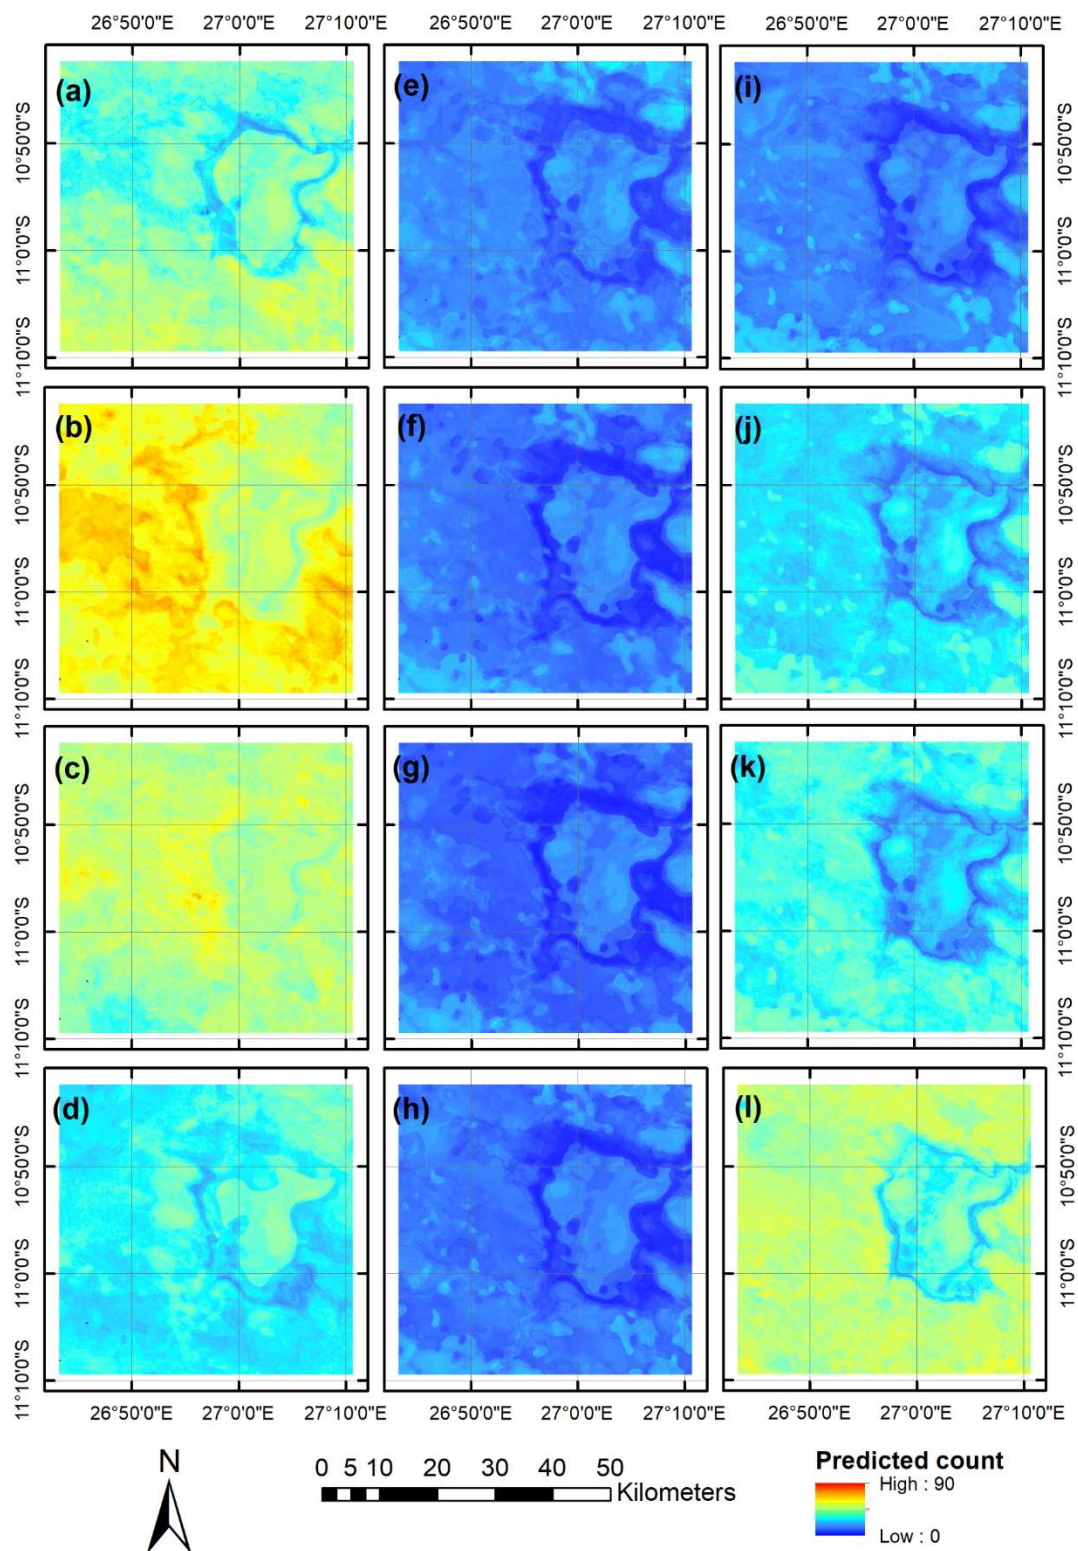

**Figure S7.** Predicted counts of *An. gambiae s.l.* for the Kapolowe study area for (a) January 2016; (b) February 2016; (c) March 2016; (d) April 2016; (e) May 2016; (f) June 2016; (g) July 2016, (h) August 2016; (i) September 2016; (j) October 2016; (k) November 2016; (l) December 2016.

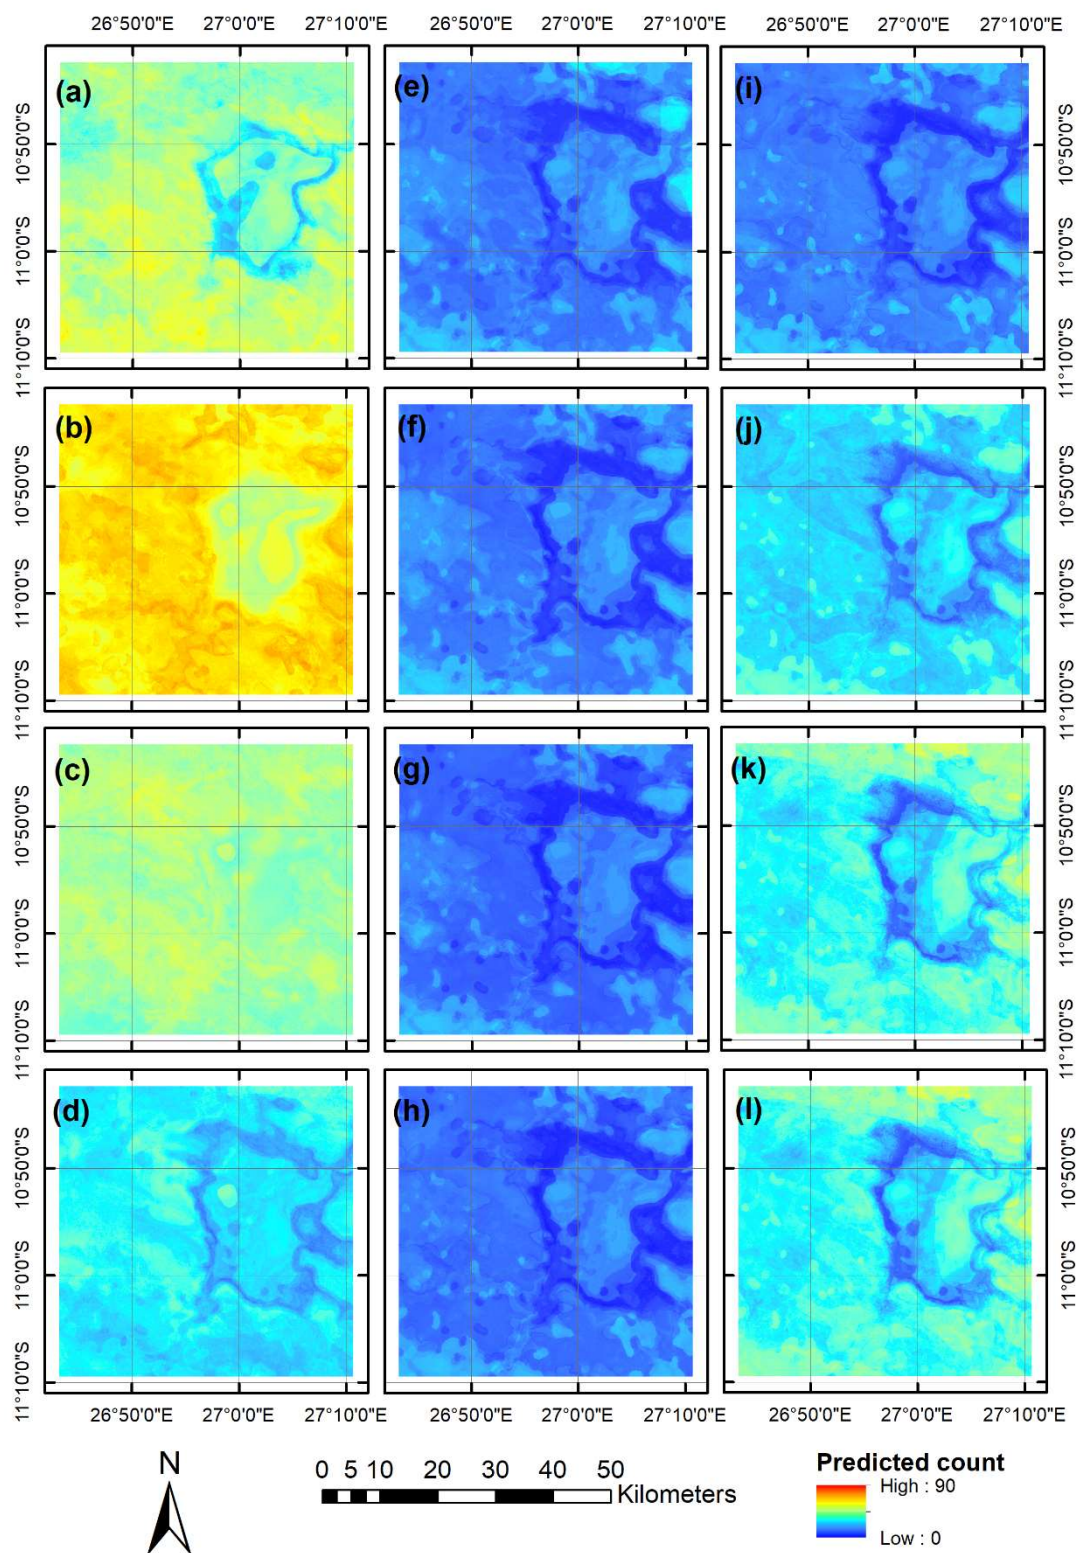

**Figure S8.** Predicted counts of *An. gambiae s.l.* for the Kapolowe study area for (a) January 2017; (b) February 2017; (c) March 2017; (d) April 2017; (e) May 2017; (f) June 2017; (g) July 2017; (h) August 2017; (i) September 2017; (j) October 2017; (k) November 2017; (l) December 2017.



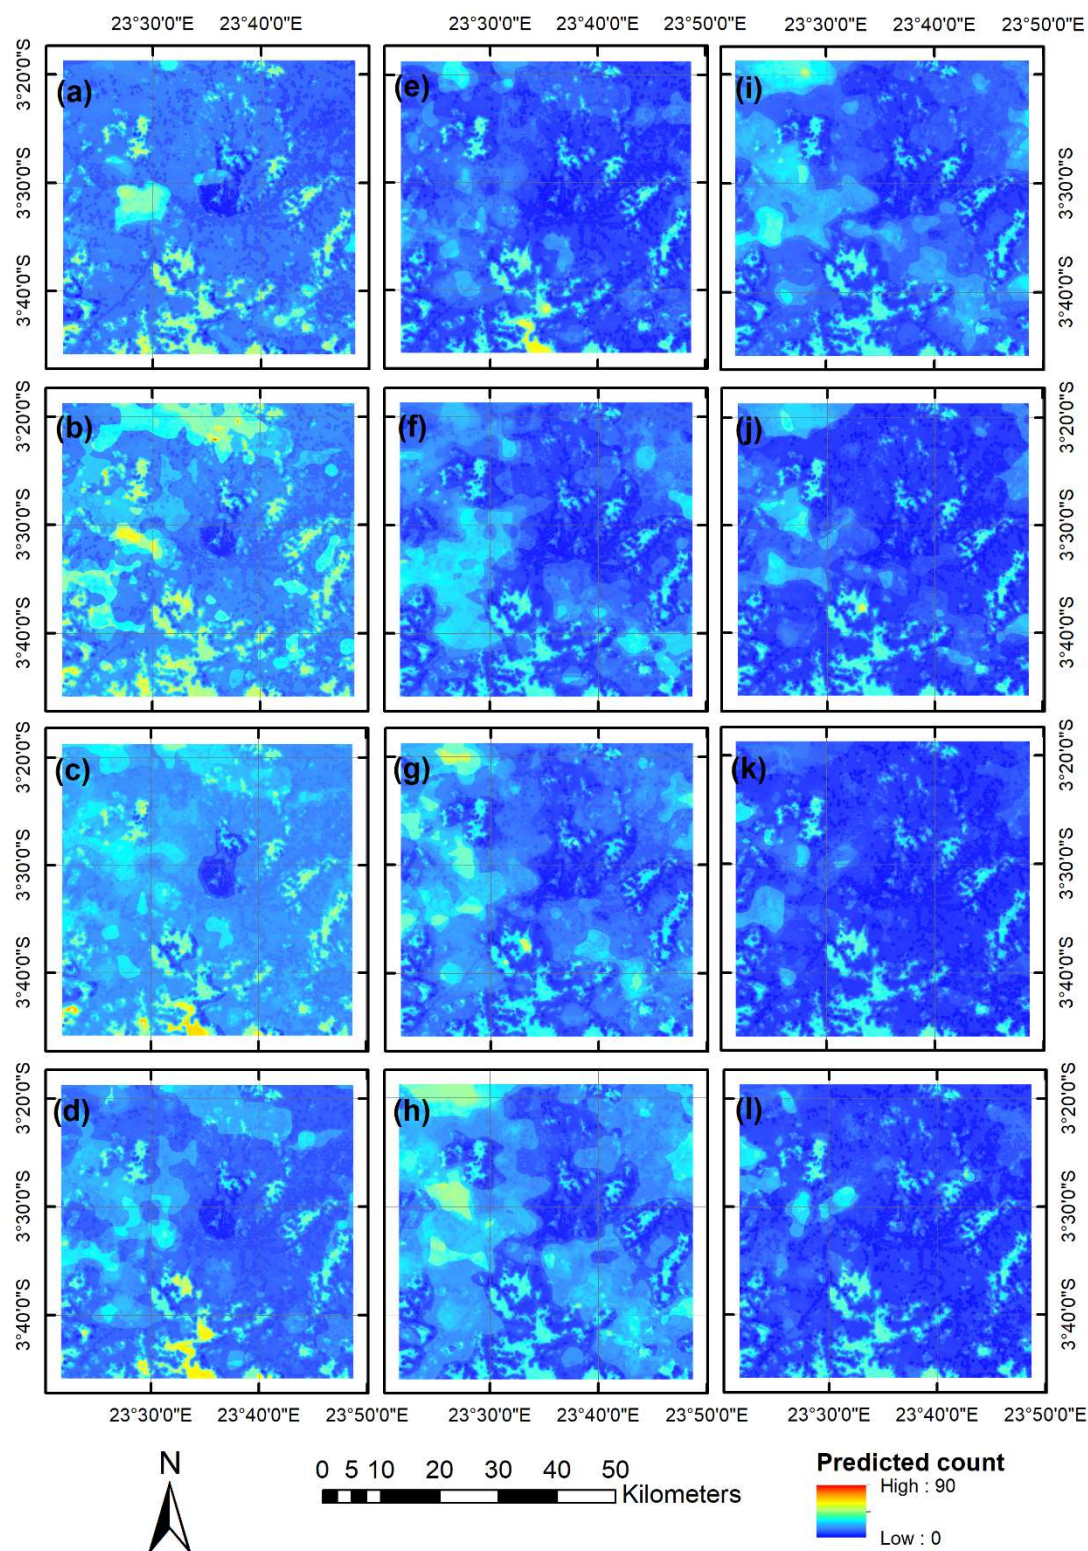

**Figure S9.** Predicted counts of *An. funestus* for the Lodja study area for (a) January 2015; (b) February 2015; (c) March 2015; (d) April 2015; (e) May 2015; (f) June 2015; (g) July 2015; (h) August 2015; (i) September 2015; (j) October 2015; (k) November 2015; (l) December 2015.



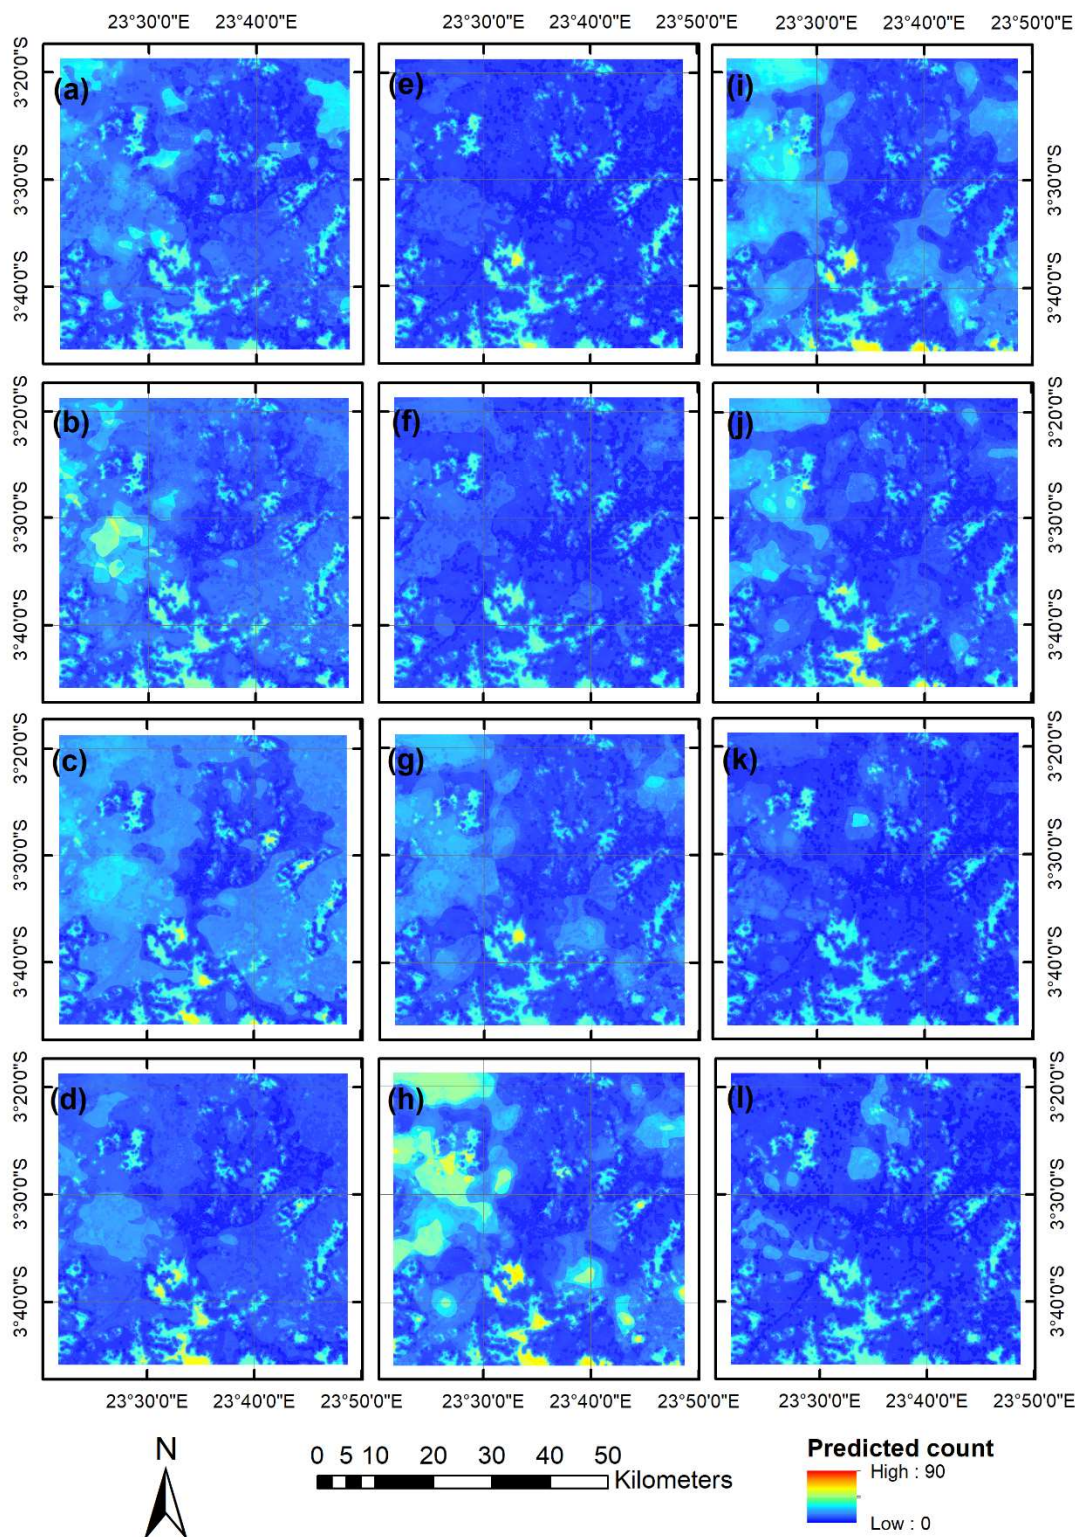

**Figure S10.** Predicted counts of *An. funestus* for the Lodja study area for (a) January 2016; (b) February 2016; (c) March 2016; (d) April 2016; (e) May 2016; (f) June 2016; (g) July 2016; (h) August 2016; (i) September 2016; (j) October 2016; (k) November 2016; (l) December 2016.



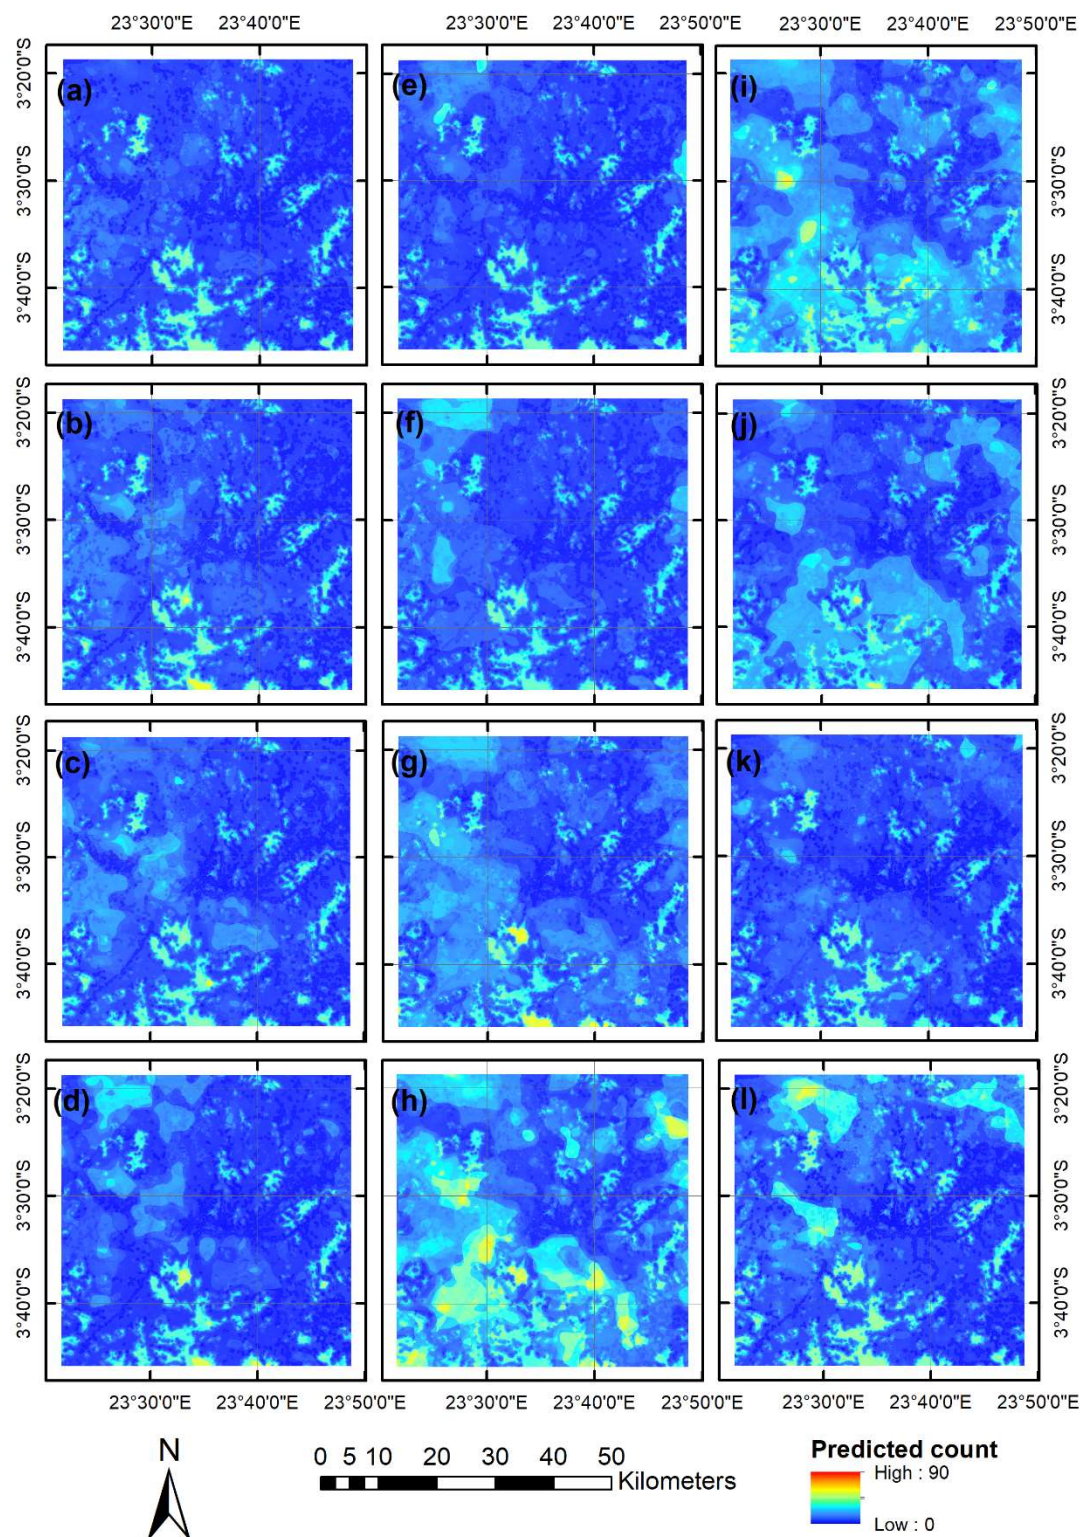

**Figure S11.** Predicted counts of *An. funestus* for the Lodja study area for (a) January 2017; (b) February 2017; (c) March 2017; (d) April 2017; (e) May 2017; (f) June 2017; (g) July 2017; (h) August 2017; (i) September 2017; (j) October 2017; (k) November 2017; (l) December 2017.



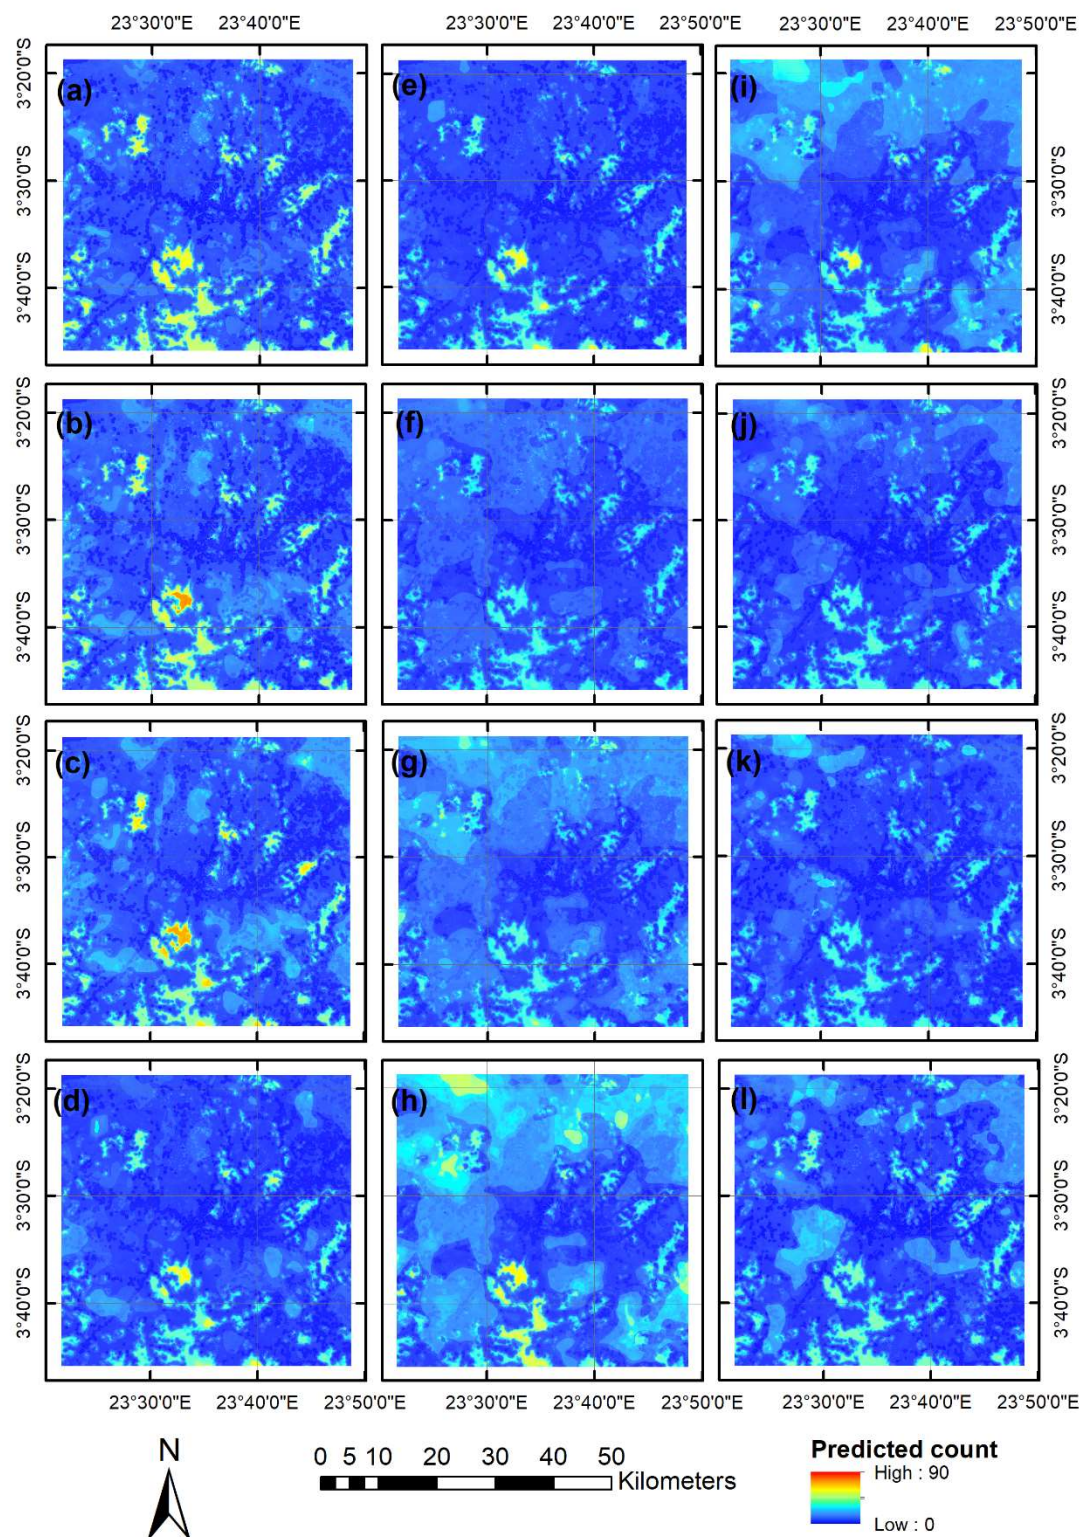

**Figure S12.** Predicted counts of *An. funestus* for the Lodja study area for (a) January 2019; (b) February 2019; (c) March 2019; (d) April 2019; (e) May 2019; (f) June 2019; (g) July 2019; (h) August 2019; (i) September 2019; (j) October 2019; (k) November 2019; (l) December 2019.



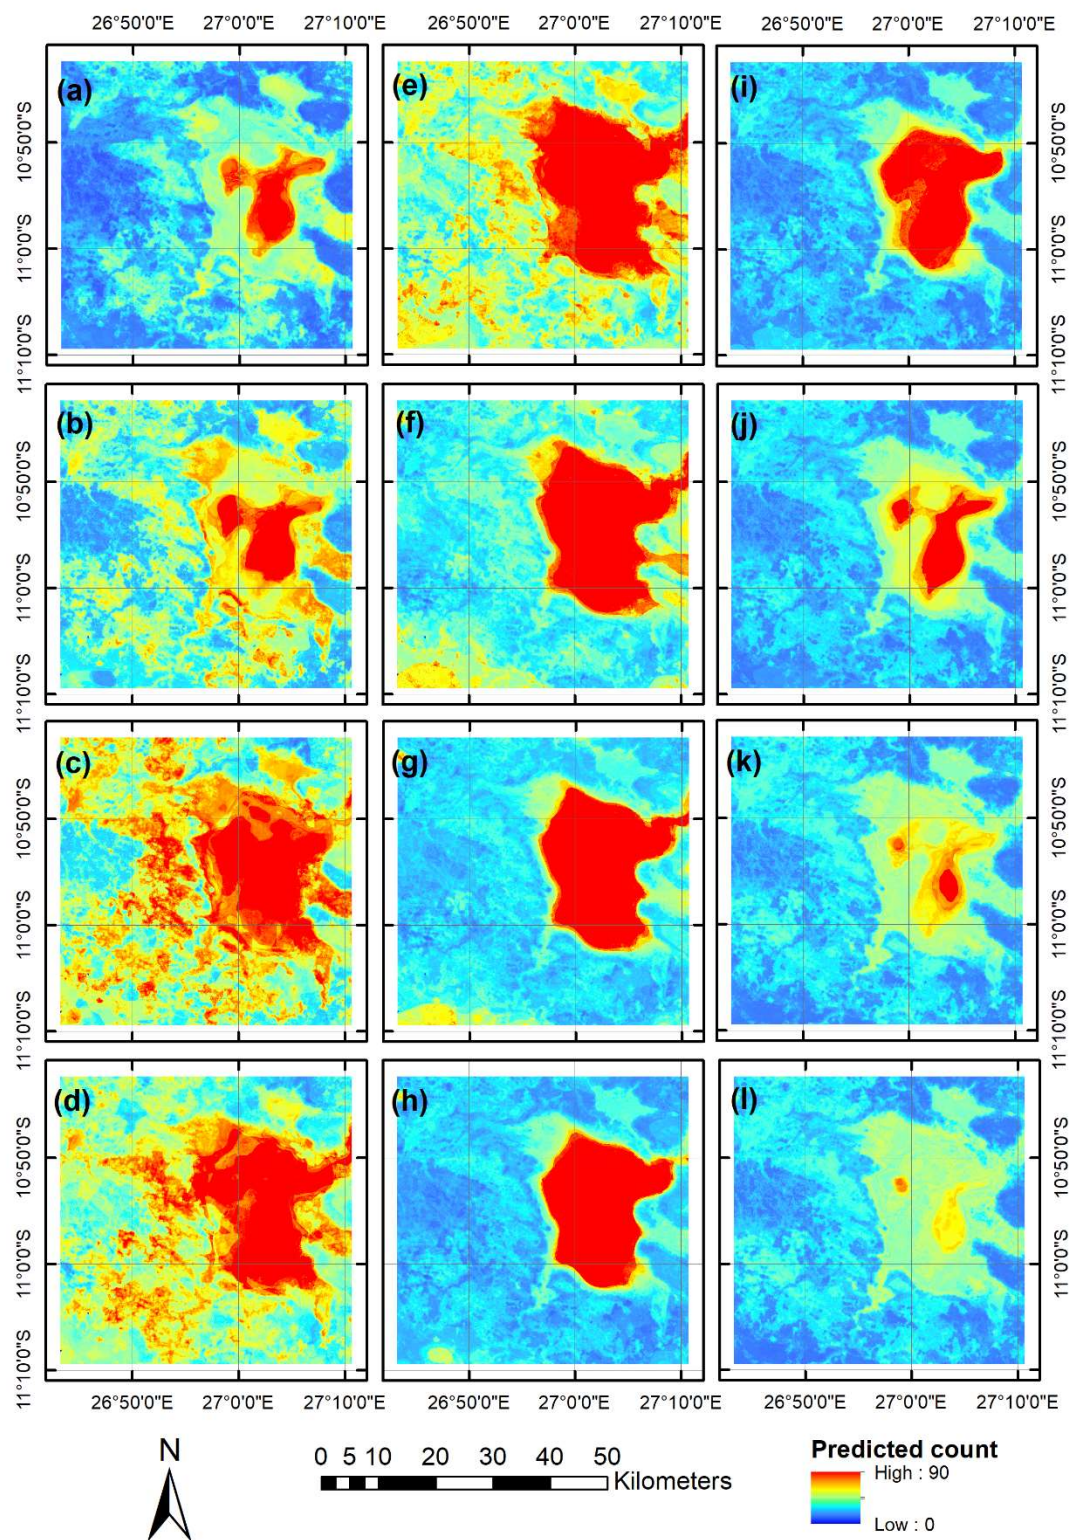

**Figure S13.** Predicted counts of *An. funestus* for the Kapolowe study area for (a) January 2016; (b) February 2016; (c) March 2016; (d) April 2016; (e) May 2016; (f) June 2016; (g) July 2016, (h) August 2016; (i) September 2016; (j) October 2016; (k) November 2016; (l) December 2016.



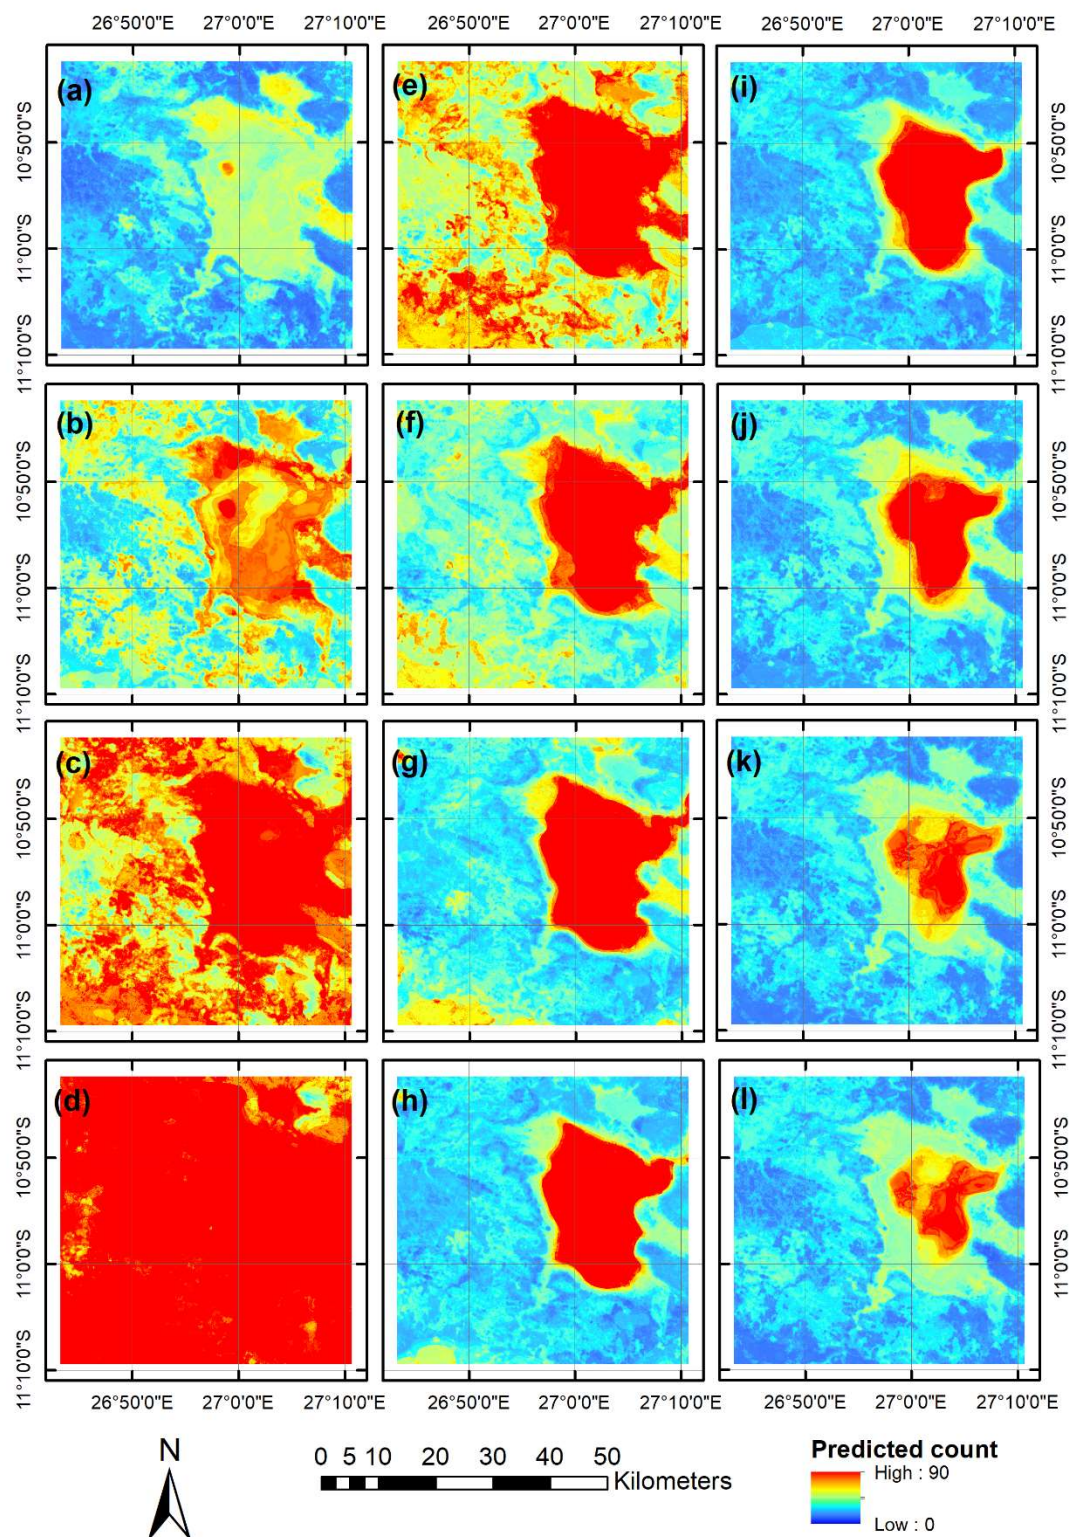

**Figure S14.** Predicted counts of *An. funestus* for the Kapolowe study area for (a) January 2017; (b) February 2017; (c) March 2017; (d) April 2017; (e) May 2017; (f) June 2017; (g) July 2017; (h) August 2017; (i) September 2017; (j) October 2017; (k) November 2017; (l) December 2017.



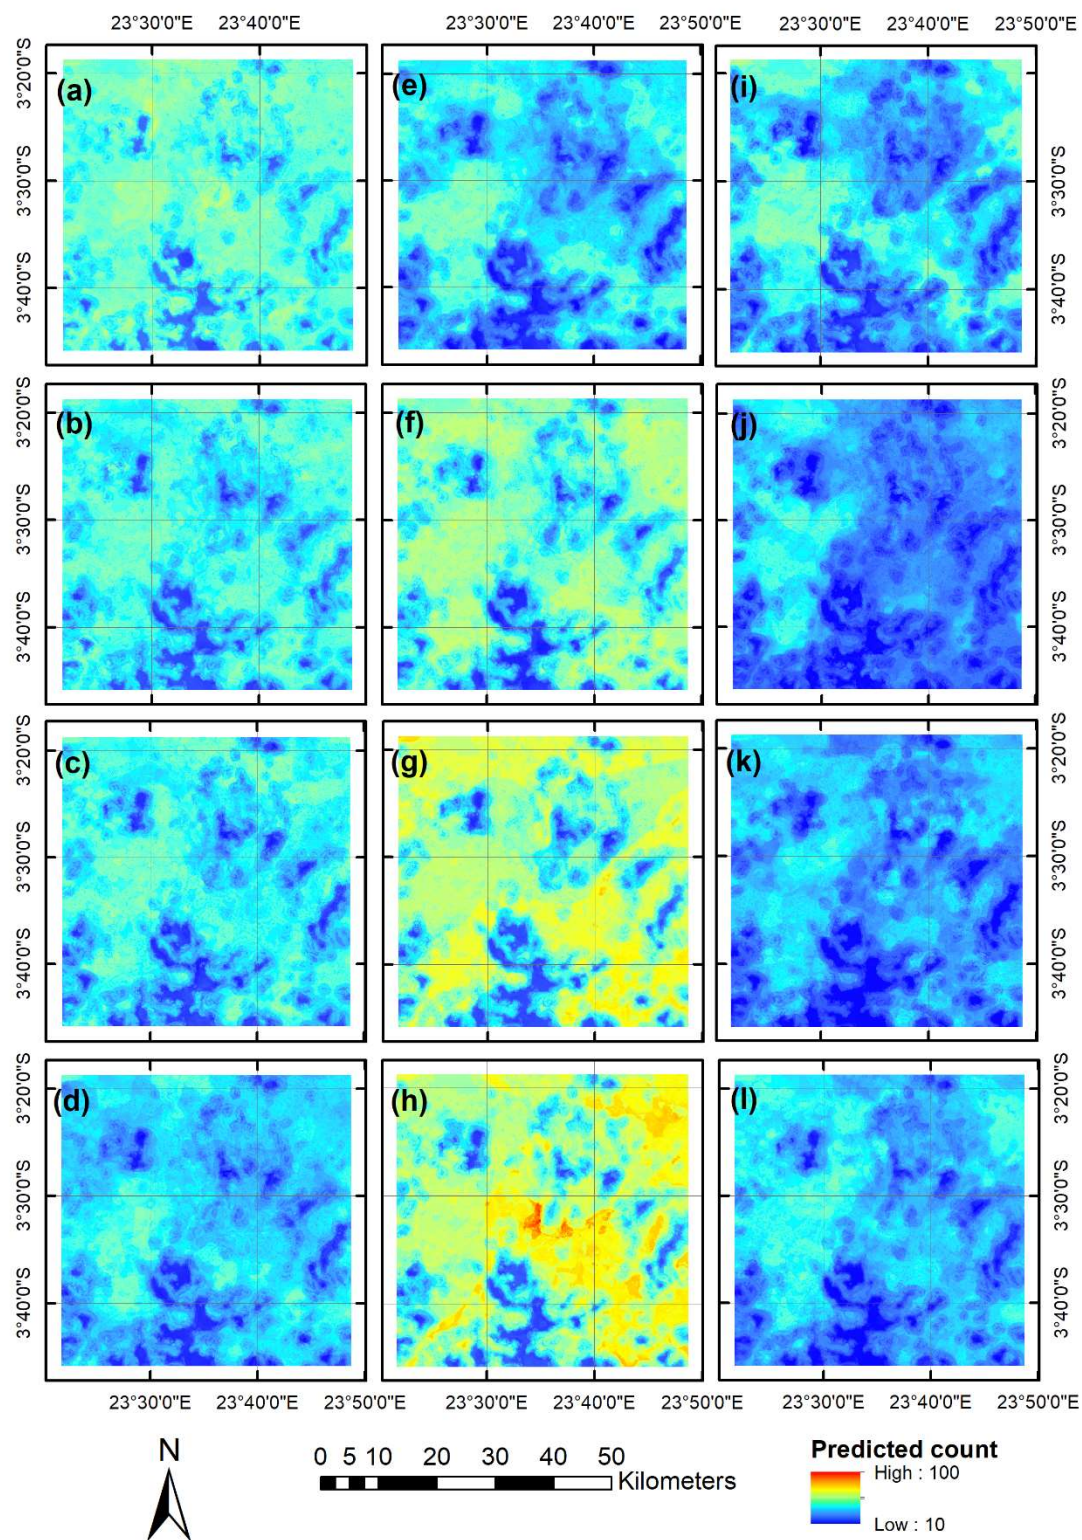

**Figure S15.** Predicted counts of *An. paludis* for the Lodja study area for (a) January 2015; (b) February 2015; (c) March 2015; (d) April 2015; (e) May 2015; (f) June 2015; (g) July 2015; (h) August 2015; (i) September 2015; (j) October 2015; (k) November 2015; (l) December 2015.

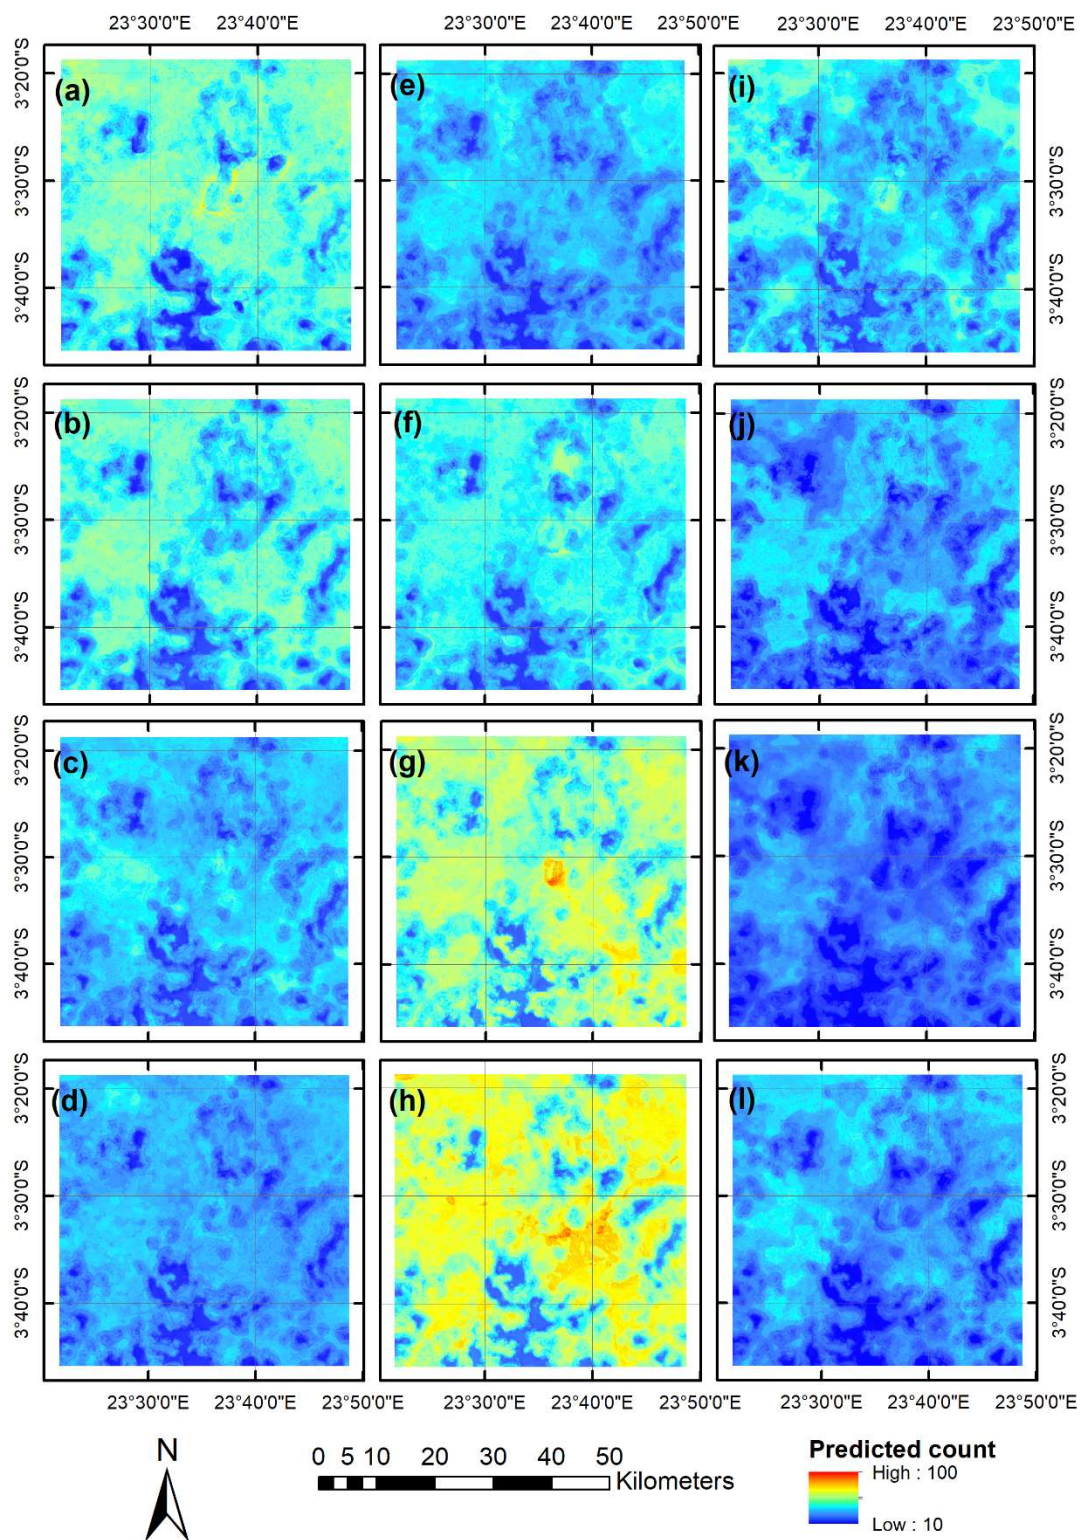

**Figure S16.** Predicted counts of *An. paludis* for the Lodja study area for (a) January 2016; (b) February 2016; (c) March 2016; (d) April 2016; (e) May 2016; (f) June 2016; (g) July 2016; (h) August 2016; (i) September 2016; (j) October 2016; (k) November 2016; (l) December 2016.



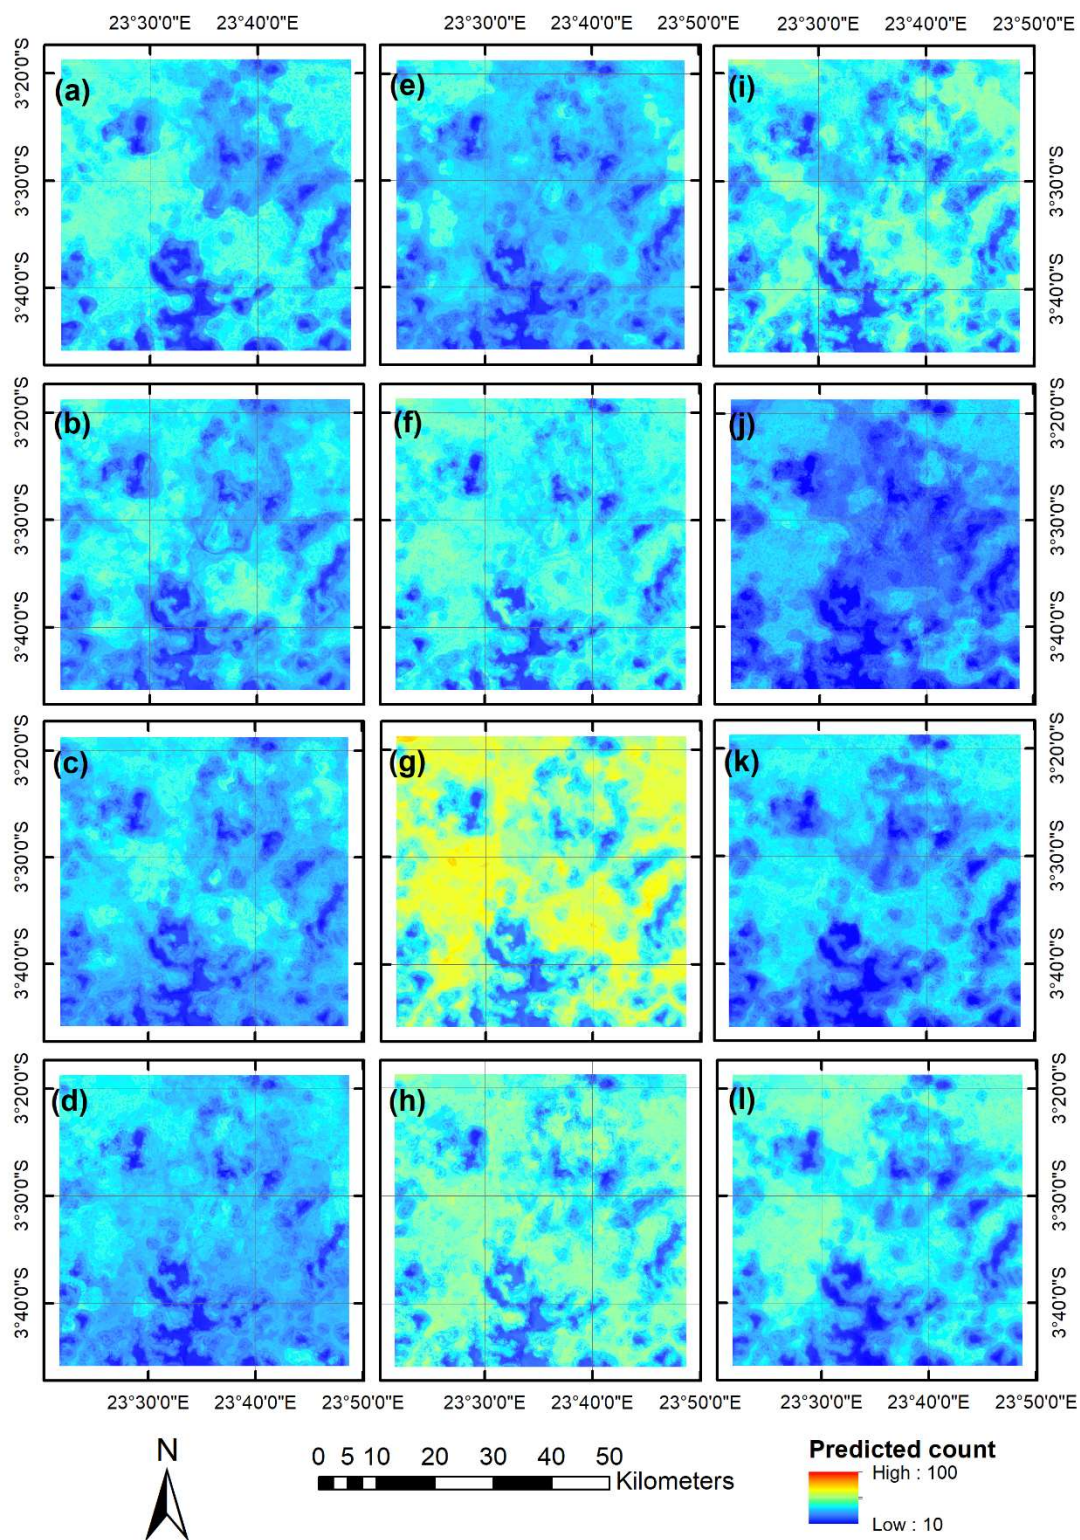

**Figure S17.** Predicted counts of *An. paludis* for the Lodja study area for (a) January 2017; (b) February 2017; (c) March 2017; (d) April 2017; (e) May 2017; (f) June 2017; (g) July 2017, (h) August 2017; (i) September 2017; (j) October 2017; (k) November 2017; (l) December 2017.

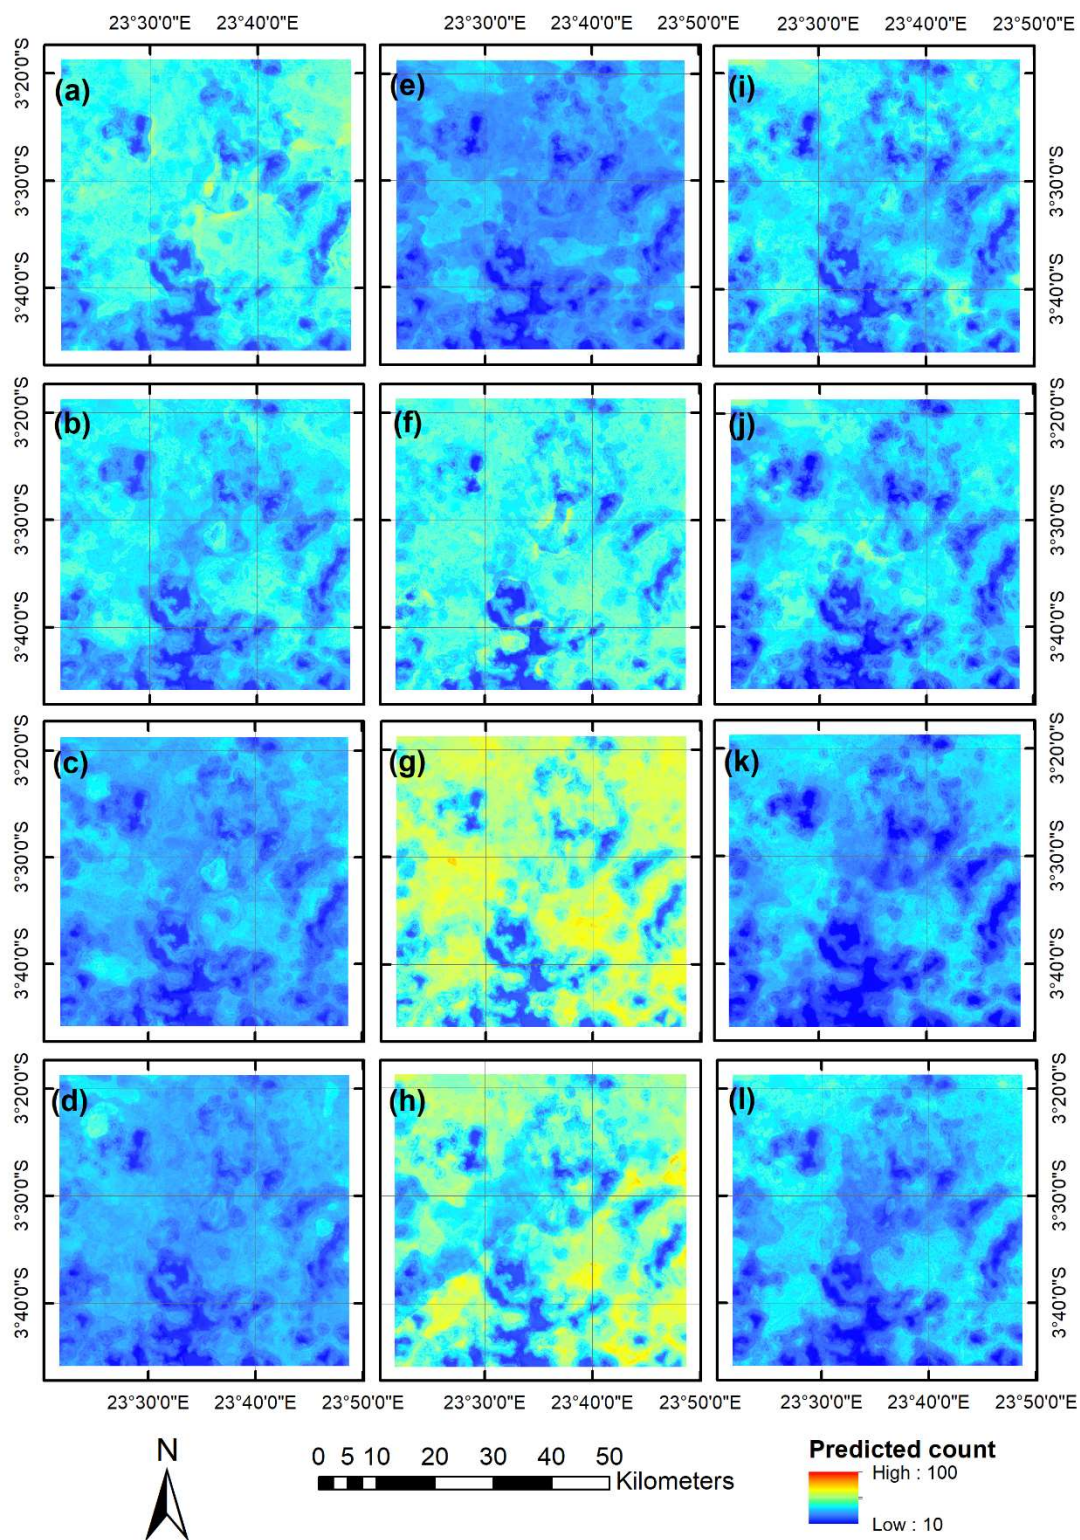

**Figure S18.** Predicted counts of *An. paludis* for the Lodja study area for (a) January 2019; (b) February 2019; (c) March 2019; (d) April 2019; (e) May 2019; (f) June 2019; (g) July 2019; (h) August 2019; (i) September 2019; (j) October 2019; (k) November 2019; (l) December 2019.



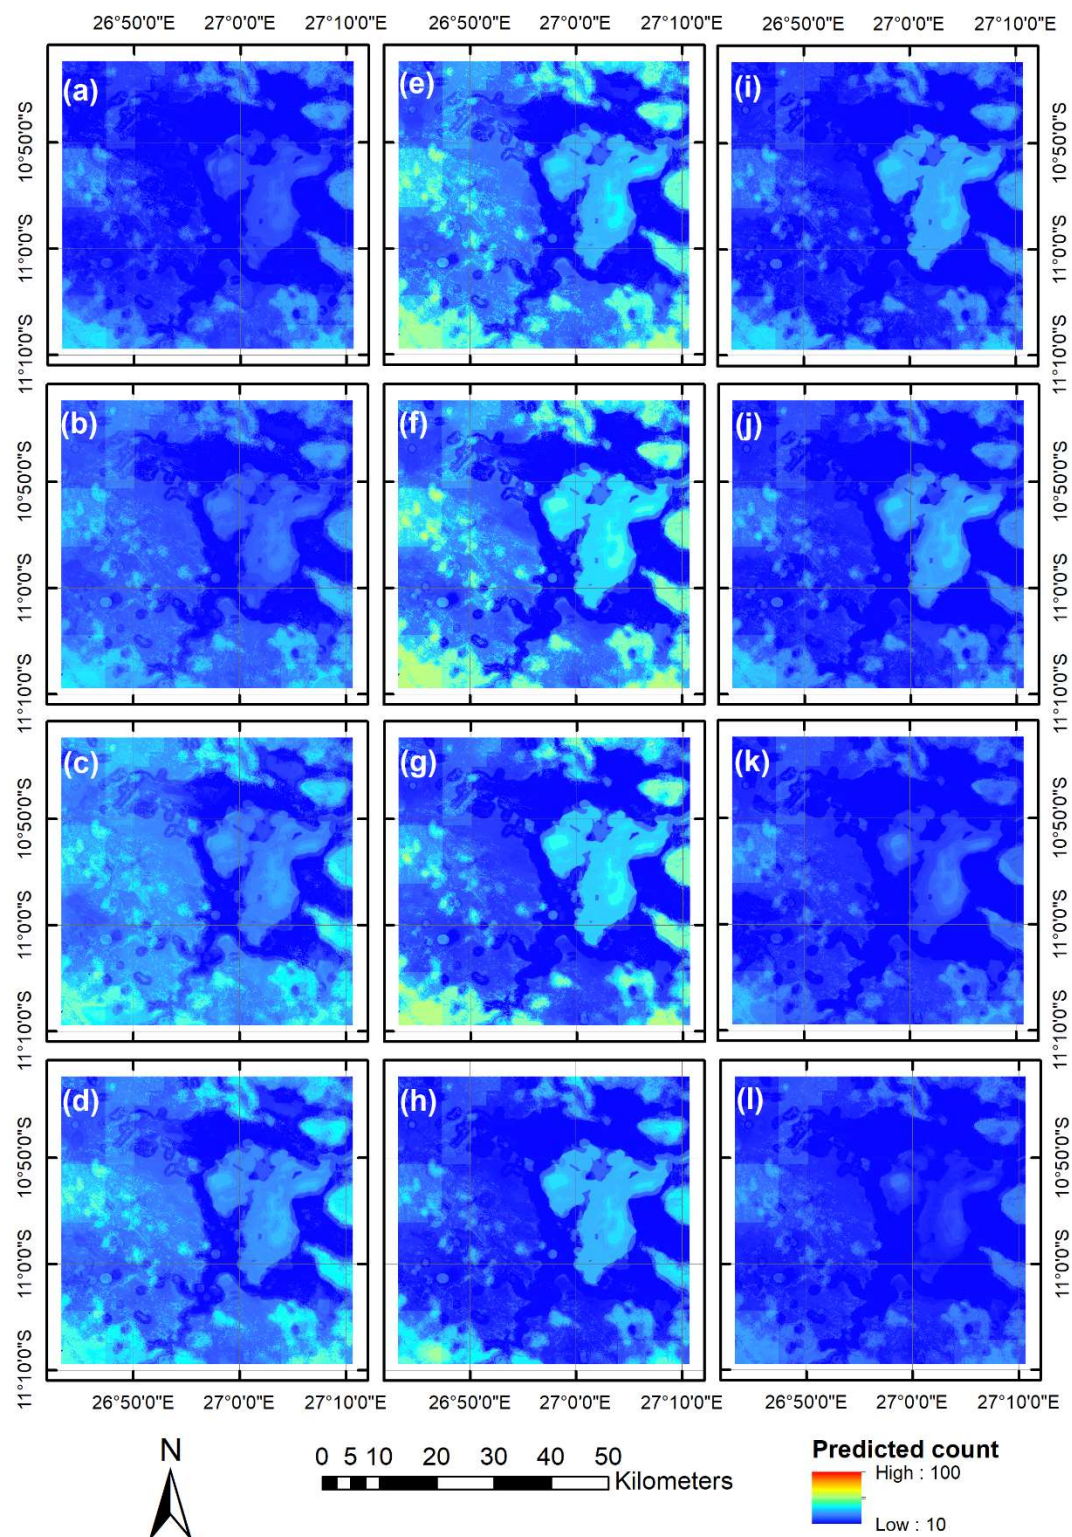

**Figure S19.** Predicted counts of *An. paludis* for the Kapolowe study area for (a) January 2016; (b) February 2016; (c) March 2016; (d) April 2016; (e) May 2016; (f) June 2016; (g) July 2016, (h) August 2016; (i) September 2016; (j) October 2016; (k) November 2016; (l) December 2016.

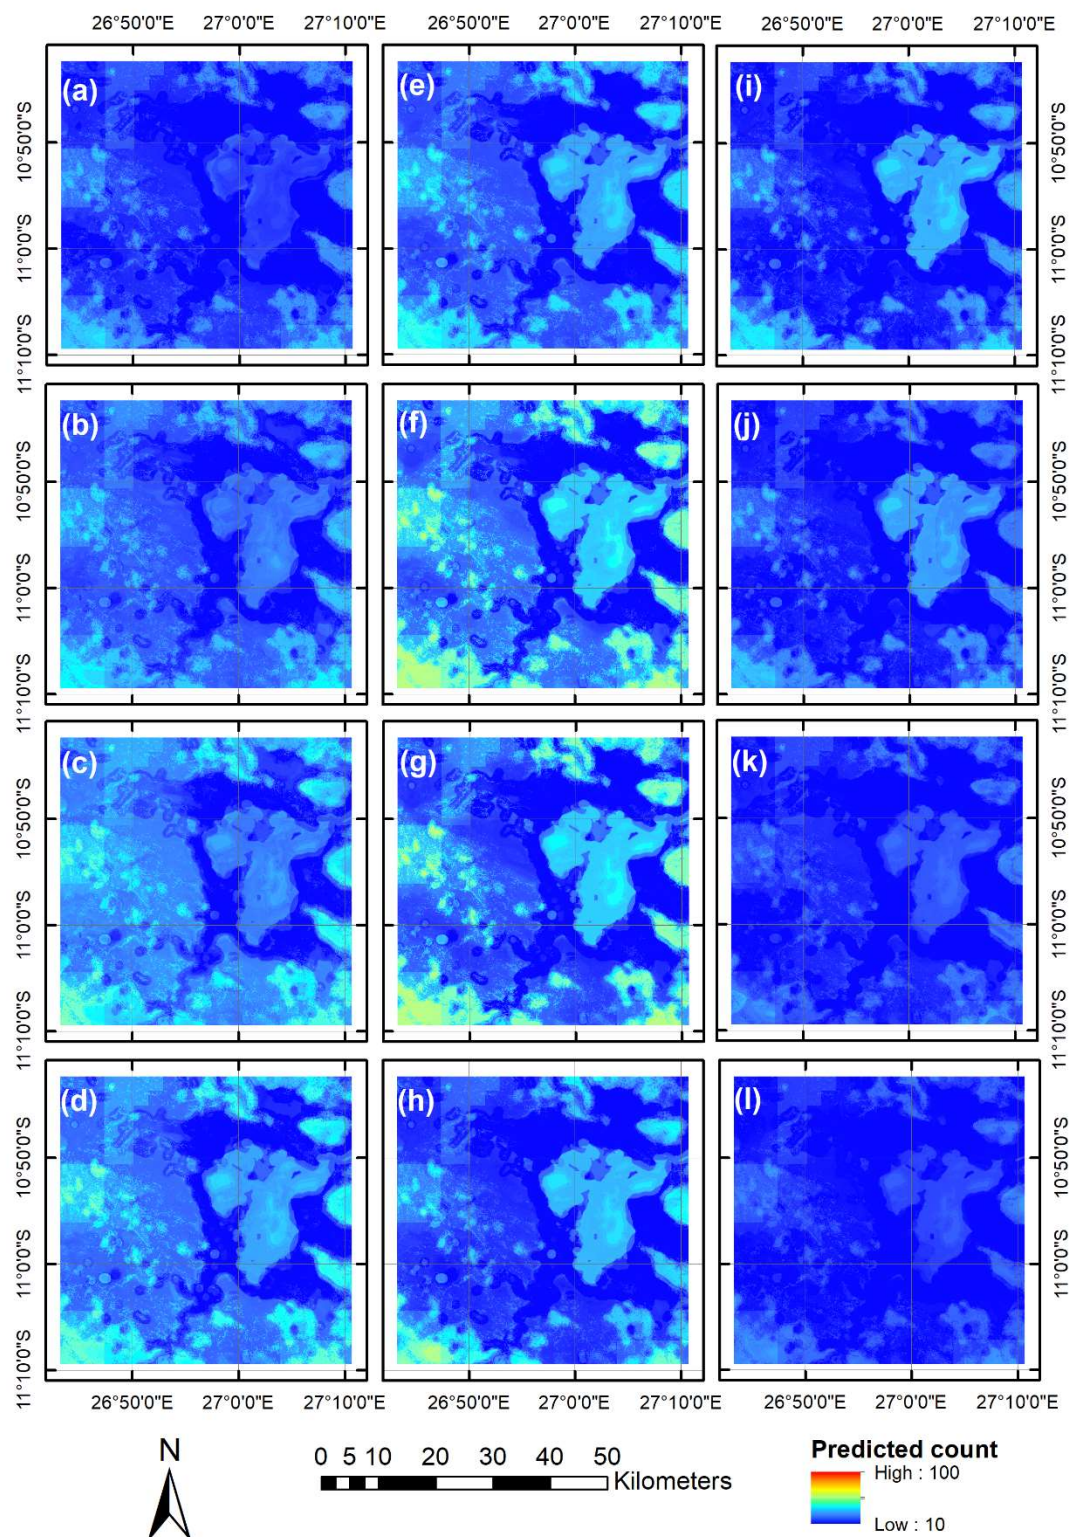

**Figure S20.** Predicted counts of *An. paludis* for the Kapolowe study area for (a) January 2017; (b) February 2017; (c) March 2017; (d) April 2017; (e) May 2017; (f) June 2017; (g) July 2017, (h) August 2017; (i) September 2017; (j) October 2017; (k) November 2017; (l) December 2017.
